# Supplementary material for: BRAFV600E remodels the melanocyte transcriptome and induces BANCR to regulate melanoma cell migration
Source: HighWire-hosted journal article supplement (doi:10.1101/gr.140061.112), 2012-05-11
Supplement: Flockhart_supplementary_table_1.docx [file Flockhart_supplementary_table_1.docx]

**Supplementary table 1**

| **PROTEIN-CODING TRANSCRIPTS CHANGED ±2-FOLD IN ALL 3 SAMPLES** | | | | | |
| --- | --- | --- | --- | --- | --- |
|  | **Fold change (log2)** | | |  |  |
|  | **MC** | **Melanoma** | |  |  |
| **Gene ID** | **+ BRAF** | **#1** | **#2** |  |  |
| NM_000641 | 10.27 | 4.00 | 1.71 |  |  |
| NM_002575 | 9.78 | 3.31 | 1.99 |  |  |
| NM_001143818 | 7.19 | 1.70 | 1.02 |  |  |
| NM_001193621 | 6.98 | 1.16 | 1.08 |  |  |
| NM_001193425 | 4.74 | 2.96 | 1.18 |  |  |
| NM_001190947 | 4.07 | 2.67 | 1.30 |  |  |
| NM_001193509 | 3.65 | 2.60 | 1.18 |  |  |
| NM_002659 | 3.29 | 2.37 | 1.39 |  |  |
| NM_000575 | 4.22 | 2.96 | 1.58 |  |  |
| NM_207330 | 2.83 | 1.87 | 1.10 |  |  |
| NM_002994 | 3.91 | 3.56 | 1.01 |  |  |
| NM_003250 | 4.38 | 3.84 | 1.71 |  |  |
| NM_001122671 | 5.20 | 2.69 | 3.21 |  |  |
| NM_006203 | 4.15 | 2.13 | 2.56 |  |  |
| NM_001195483 | 4.15 | 2.26 | 2.53 |  |  |
| NM_005261 | 3.47 | 1.92 | 2.04 |  |  |
| NM_001024094 | 1.51 | 1.09 | 1.00 |  |  |
| NM_001005376 | 2.78 | 1.93 | 1.55 |  |  |
| NM_000361 | 1.83 | 1.30 | 1.10 |  |  |
| NM_033027 | 2.95 | 2.04 | 1.77 |  |  |
| NM_004591 | 4.99 | 3.36 | 2.88 |  |  |
| NM_006079 | 1.77 | 1.16 | 1.12 |  |  |
| NM_145902 | 8.49 | 5.27 | 5.20 |  |  |
| NM_021960 | 2.43 | 1.52 | 1.40 |  |  |
| NM_001042522 | 4.07 | 2.13 | 2.03 |  |  |
| NM_001199389 | 3.68 | 1.92 | 1.72 |  |  |
| NM_001657 | 6.83 | 3.92 | 3.17 |  |  |
| NM_032780 | 3.39 | 1.95 | 1.69 |  |  |
| NM_001193426 | 5.18 | 3.17 | 2.12 |  |  |
| NM_025246 | 2.42 | 1.58 | 1.03 |  |  |
| NM_022842 | 7.86 | 5.20 | 3.76 |  |  |
| NM_002820 | 4.38 | 1.52 | 1.28 |  |  |
| NM_001097600 | 3.39 | 1.24 | 1.34 |  |  |
| NM_198966 | 4.40 | 1.55 | 1.58 |  |  |
| NM_001142427 | 5.01 | 2.53 | 1.99 |  |  |
| NM_004878 | 2.37 | 1.25 | 1.02 |  |  |
| NM_003937 | 3.13 | 1.45 | 1.04 |  |  |
| NM_001657_dup1 | 7.54 | 3.95 | 2.68 |  |  |
| NM_002421 | 4.92 | 2.47 | 1.73 |  |  |
| NM_182759 | 4.43 | 2.14 | 1.55 |  |  |
| NM_018948 | 4.03 | 2.27 | 1.52 |  |  |
| NM_001164179 | 3.74 | 1.74 | 1.05 |  |  |
| NM_017705 | 4.66 | 1.95 | 1.29 |  |  |
| NM_018689 | 4.26 | 1.83 | 1.25 |  |  |
| NM_001166212 | 6.82 | 2.99 | 2.96 |  |  |
| NM_002507 | 5.79 | 2.67 | 2.86 |  |  |
| NM_147783 | 2.68 | 1.28 | 1.31 |  |  |
| NM_006528 | 8.57 | 3.25 | 4.14 |  |  |
| NM_001136015 | 4.25 | 2.13 | 3.49 |  |  |
| NM_001010846 | 2.81 | 1.12 | 2.29 |  |  |
| NM_001113493 | 2.33 | 1.05 | 2.08 |  |  |
| NM_006350 | 3.53 | 1.61 | 3.26 |  |  |
| NM_001177948 | 4.97 | 1.22 | 4.76 |  |  |
| NM_015973 | 3.81 | 1.01 | 3.34 |  |  |
| NM_003654 | 4.12 | 1.18 | 2.56 |  |  |
| NM_001002796 | 2.21 | 1.19 | 2.35 |  |  |
| NM_001161500 | 4.30 | 2.37 | 4.81 |  |  |
| NM_014587 | 3.91 | 1.93 | 4.25 |  |  |
| NM_003543 | 2.49 | 1.04 | 2.49 |  |  |
| NM_000439 | 2.84 | 1.67 | 3.68 |  |  |
| NM_001145542 | 3.84 | 2.32 | 4.98 |  |  |
| NM_001135247 | 4.91 | 3.39 | 6.31 |  |  |
| NM_001167672 | 3.95 | 2.87 | 4.87 |  |  |
| NM_153460 | 1.32 | 1.03 | 1.65 |  |  |
| NM_001113349 | 2.21 | 1.02 | 3.43 |  |  |
| NM_001178146 | 2.93 | 1.32 | 4.76 |  |  |
| NM_001458 | 4.02 | 1.75 | 5.51 |  |  |
| NM_015931 | 2.30 | 1.19 | 3.41 |  |  |
| NM_002276 | 3.69 | 1.20 | 5.14 |  |  |
| NM_001858 | 2.80 | 1.78 | 4.44 |  |  |
| NM_213674 | 1.70 | 1.15 | 2.78 |  |  |
| NM_001048221 | 3.06 | 5.85 | 1.35 |  |  |
| NM_001007068 | 1.21 | 8.57 | 3.18 |  |  |
| NM_002867 | 1.11 | 5.27 | 2.90 |  |  |
| NM_016655 | 1.00 | 3.62 | 1.85 |  |  |
| NM_001102369 | 2.87 | 3.44 | 3.10 |  |  |
| NM_001037535 | 3.95 | 4.88 | 4.50 |  |  |
| NM_001184704 | 4.27 | 5.22 | 4.84 |  |  |
| NM_001135095 | 1.74 | 2.25 | 2.06 |  |  |
| NM_001077664 | 2.16 | 2.70 | 2.54 |  |  |
| NM_001171949 | 1.39 | 1.76 | 1.65 |  |  |
| NM_001006945 | 3.53 | 4.07 | 4.01 |  |  |
| NM_002229 | 1.80 | 2.13 | 2.03 |  |  |
| NM_001077441 | 1.09 | 1.15 | 1.23 |  |  |
| NM_001171509 | 3.10 | 3.23 | 3.45 |  |  |
| NM_000094 | 3.13 | 3.48 | 3.57 |  |  |
| NM_002373 | 1.32 | 1.49 | 1.51 |  |  |
| NM_001135245 | 4.74 | 5.18 | 5.25 |  |  |
| NM_005978 | 7.26 | 8.01 | 8.16 |  |  |
| NM_001193544 | 4.05 | 4.50 | 4.48 |  |  |
| NM_004443 | 4.21 | 4.51 | 4.61 |  |  |
| NM_001124 | 2.21 | 2.30 | 2.18 |  |  |
| NM_001134338 | 1.17 | 1.17 | 1.14 |  |  |
| NM_002160 | 5.87 | 6.05 | 6.06 |  |  |
| NM_030964 | 3.85 | 3.92 | 3.91 |  |  |
| NM_001130032 | 4.02 | 4.50 | 4.11 |  |  |
| NM_014969 | 1.95 | 2.21 | 2.06 |  |  |
| NM_006988 | 2.45 | 2.72 | 2.42 |  |  |
| NM_001079818 | 2.99 | 2.64 | 3.14 |  |  |
| NM_001105552 | 2.66 | 2.35 | 2.93 |  |  |
| NM_001142936 | 3.00 | 3.00 | 3.67 |  |  |
| NM_001170820 | 3.25 | 3.15 | 3.59 |  |  |
| NM_001102368 | 4.97 | 4.82 | 5.67 |  |  |
| NM_003823 | 5.59 | 5.53 | 6.44 |  |  |
| NM_001105538 | 3.89 | 3.89 | 4.42 |  |  |
| NM_177939 | 1.03 | 1.03 | 1.16 |  |  |
| NM_001042496 | 4.71 | 4.58 | 4.94 |  |  |
| NM_002872 | 4.93 | 4.73 | 5.20 |  |  |
| NM_153211 | 1.29 | 1.19 | 1.33 |  |  |
| NM_001033873 | 3.80 | 3.51 | 3.75 |  |  |
| NM_001008489 | 3.45 | 3.25 | 3.39 |  |  |
| NM_001193461 | 4.21 | 3.98 | 4.22 |  |  |
| NM_002587 | 4.98 | 4.68 | 4.81 |  |  |
| NM_001191036 | 5.14 | 4.59 | 4.64 |  |  |
| NM_003744 | 7.13 | 6.50 | 6.66 |  |  |
| NM_001005744 | 7.17 | 5.94 | 6.53 |  |  |
| NM_002192 | 6.22 | 5.22 | 5.62 |  |  |
| NM_003059 | 3.51 | 2.99 | 3.24 |  |  |
| NM_003415 | 4.10 | 3.61 | 3.93 |  |  |
| NM_003873 | 8.14 | 6.89 | 7.80 |  |  |
| NM_138970 | 4.58 | 3.89 | 4.49 |  |  |
| NM_003483 | 4.44 | 3.59 | 4.15 |  |  |
| NM_004163 | 3.53 | 2.83 | 3.37 |  |  |
| NM_020717 | 1.37 | 1.07 | 1.28 |  |  |
| NM_013409 | 6.44 | 4.98 | 5.74 |  |  |
| NM_000602 | 3.86 | 4.53 | 3.41 |  |  |
| NM_001197098 | 1.91 | 2.06 | 1.62 |  |  |
| NM_005562 | 4.43 | 4.94 | 4.00 |  |  |
| NM_016569 | 3.85 | 4.35 | 3.38 |  |  |
| NM_006732 | 5.65 | 6.45 | 5.33 |  |  |
| NM_001039667 | 5.14 | 5.32 | 3.81 |  |  |
| NM_004696 | 1.80 | 1.89 | 1.38 |  |  |
| NM_015193 | 3.18 | 3.33 | 2.46 |  |  |
| NM_001193584 | 4.98 | 4.96 | 3.97 |  |  |
| NM_002250 | 8.00 | 8.09 | 6.45 |  |  |
| NM_002905 | 5.86 | 6.05 | 4.78 |  |  |
| NM_017671 | 4.02 | 3.81 | 3.06 |  |  |
| NM_001135732 | 3.92 | 3.68 | 3.18 |  |  |
| NM_000399 | 6.48 | 5.73 | 5.13 |  |  |
| NM_080388 | 2.65 | 2.38 | 2.12 |  |  |
| NM_001032394 | 1.91 | 1.64 | 1.55 |  |  |
| NM_002376 | 2.23 | 1.97 | 1.89 |  |  |
| NM_022810 | 1.60 | 1.39 | 1.33 |  |  |
| NM_130435 | 4.12 | 3.64 | 3.42 |  |  |
| NM_001014763 | 1.91 | 1.89 | 1.70 |  |  |
| NM_001171622 | 4.42 | 4.41 | 3.94 |  |  |
| NM_001964 | 4.47 | 4.51 | 3.98 |  |  |
| NM_013410 | 3.99 | 4.06 | 3.58 |  |  |
| NM_001164283 | 5.39 | 5.18 | 4.62 |  |  |
| NM_138461 | 3.51 | 3.26 | 3.05 |  |  |
| NM_032641 | 2.08 | 1.98 | 1.90 |  |  |
| NM_198569 | 1.92 | 1.83 | 1.74 |  |  |
| NM_001166692 | 3.16 | 2.16 | 2.56 |  |  |
| NM_001200 | 4.76 | 3.27 | 3.96 |  |  |
| NM_001142286 | 3.45 | 2.24 | 2.90 |  |  |
| NM_001007101 | 2.08 | 1.31 | 1.86 |  |  |
| NM_002752 | 6.48 | 4.19 | 5.70 |  |  |
| NM_024409 | 4.00 | 2.69 | 3.58 |  |  |
| NM_001168385 | 2.06 | 1.24 | 1.41 |  |  |
| NM_017411_dup1 | 4.32 | 2.62 | 3.01 |  |  |
| NM_004093 | 5.44 | 3.30 | 4.29 |  |  |
| NM_015719 | 5.27 | 2.96 | 3.91 |  |  |
| NM_001146178 | 4.40 | 3.42 | 3.27 |  |  |
| NM_002206 | 5.72 | 4.14 | 4.27 |  |  |
| NM_022119 | 5.03 | 3.64 | 3.69 |  |  |
| NM_006504 | 4.75 | 3.83 | 3.81 |  |  |
| NM_004438 | 3.66 | 2.48 | 3.87 |  |  |
| NM_001001890 | 2.01 | 1.37 | 1.91 |  |  |
| NM_004675 | 5.18 | 3.62 | 5.01 |  |  |
| NM_014863 | 3.46 | 2.56 | 3.48 |  |  |
| NM_001338 | 1.85 | 1.45 | 1.83 |  |  |
| NM_144974 | 2.35 | 1.88 | 2.52 |  |  |
| NM_001040058 | 1.66 | 1.46 | 1.19 |  |  |
| NM_005884 | 6.96 | 6.19 | 5.02 |  |  |
| NM_000170 | 3.48 | 3.03 | 2.60 |  |  |
| NM_207343 | 2.14 | 1.83 | 1.57 |  |  |
| NM_001184794 | 4.14 | 3.61 | 2.81 |  |  |
| NM_002309 | 8.47 | 7.27 | 5.56 |  |  |
| NM_015444 | 5.24 | 4.43 | 3.34 |  |  |
| NM_002539 | 2.69 | 2.22 | 1.75 |  |  |
| NM_032591 | 5.35 | 4.41 | 3.42 |  |  |
| NM_001025370 | 4.35 | 4.02 | 2.99 |  |  |
| NM_001199975 | 5.68 | 5.20 | 3.67 |  |  |
| NM_001171626 | 3.57 | 3.34 | 2.27 |  |  |
| NM_005118 | 3.86 | 3.67 | 2.48 |  |  |
| NM_006022 | 4.18 | 3.93 | 2.61 |  |  |
| NM_178039 | 3.92 | 3.74 | 2.40 |  |  |
| NM_174977 | 4.50 | 4.15 | 2.65 |  |  |
| NM_001190447 | 2.56 | 2.53 | 1.52 |  |  |
| NM_025195 | 1.76 | 1.77 | 1.03 |  |  |
| NM_001145368 | 3.68 | 3.02 | 1.76 |  |  |
| NM_001184785 | 3.71 | 2.79 | 1.89 |  |  |
| NM_001958 | 3.76 | 2.75 | 1.88 |  |  |
| NM_001432 | 6.46 | 5.36 | 3.84 |  |  |
| NM_006931 | 1.91 | 1.56 | 1.16 |  |  |
| NM_004936 | 4.02 | 3.49 | 2.32 |  |  |
| NM_152637 | 6.80 | 5.67 | 3.73 |  |  |
| NM_139314 | 8.21 | 6.28 | 4.74 |  |  |
| NM_000693 | 1.27 | 3.25 | 1.23 |  |  |
| NM_001195278 | 1.36 | 3.50 | 1.15 |  |  |
| NM_003957 | 1.37 | 3.35 | 1.16 |  |  |
| NM_001853 | 1.17 | 2.91 | 1.32 |  |  |
| NM_001134418 | 1.88 | 4.25 | 1.89 |  |  |
| NM_001166265 | 1.82 | 3.97 | 1.69 |  |  |
| NM_001145149 | 2.00 | 4.16 | 1.62 |  |  |
| NM_022160 | 1.78 | 3.76 | 1.53 |  |  |
| NM_199231 | 2.40 | 4.91 | 1.70 |  |  |
| NM_000201 | 1.44 | 3.35 | 2.22 |  |  |
| NM_001190265 | 2.39 | 5.37 | 3.51 |  |  |
| NM_001030287 | 1.03 | 2.24 | 1.53 |  |  |
| NM_000298 | 1.87 | 4.30 | 2.98 |  |  |
| NM_031950 | 1.34 | 3.08 | 2.10 |  |  |
| NM_001162367 | 1.97 | 3.90 | 2.35 |  |  |
| NM_003234 | 1.00 | 2.11 | 1.27 |  |  |
| NM_001129729 | 1.06 | 2.16 | 1.39 |  |  |
| NM_024493 | 1.02 | 2.00 | 1.27 |  |  |
| NM_006759 | 1.26 | 2.39 | 1.61 |  |  |
| NM_001003395 | 1.62 | 4.40 | 2.53 |  |  |
| NM_002744 | 1.98 | 5.50 | 2.99 |  |  |
| NM_006930 | 1.14 | 3.18 | 1.74 |  |  |
| NM_001199279 | 2.07 | 5.21 | 2.87 |  |  |
| NM_006080 | 1.11 | 2.73 | 1.50 |  |  |
| NM_001017402 | 1.75 | 3.47 | 1.88 |  |  |
| NM_000785 | 1.59 | 3.12 | 1.55 |  |  |
| NM_152573 | 1.47 | 2.89 | 1.34 |  |  |
| NM_001130145 | 2.74 | 4.66 | 2.42 |  |  |
| NM_001135153 | 2.19 | 3.62 | 1.85 |  |  |
| NM_004328 | 1.44 | 2.29 | 1.20 |  |  |
| NM_198461 | 2.33 | 4.03 | 1.94 |  |  |
| NM_001105206 | 2.33 | 4.01 | 2.21 |  |  |
| NM_025153 | 2.84 | 4.94 | 2.83 |  |  |
| NM_001164266 | 1.52 | 2.71 | 1.41 |  |  |
| NM_021705 | 1.11 | 2.04 | 1.09 |  |  |
| NM_001945 | 2.45 | 3.69 | 2.44 |  |  |
| NM_002462 | 1.48 | 2.26 | 1.47 |  |  |
| NM_005099 | 1.91 | 2.95 | 1.81 |  |  |
| NM_022071 | 2.16 | 3.53 | 2.11 |  |  |
| NM_024599 | 1.17 | 2.00 | 1.25 |  |  |
| NM_000576 | 6.71 | 8.93 | 6.97 |  |  |
| NM_001012398 | 3.40 | 4.19 | 3.53 |  |  |
| NM_001131064 | 1.21 | 1.51 | 1.25 |  |  |
| NM_001002901 | 1.31 | 1.66 | 1.30 |  |  |
| NM_054027 | 1.03 | 1.25 | 1.01 |  |  |
| NM_001134194 | 3.47 | 4.37 | 3.22 |  |  |
| NM_001621 | 1.46 | 2.02 | 1.41 |  |  |
| NM_016620 | 3.18 | 4.24 | 2.96 |  |  |
| NM_001098634 | 3.35 | 4.65 | 3.39 |  |  |
| NM_201403 | 1.37 | 1.88 | 1.38 |  |  |
| NM_001001551 | 2.82 | 3.83 | 3.70 |  |  |
| NM_004058 | 3.02 | 4.03 | 3.81 |  |  |
| NM_001029864 | 2.10 | 2.76 | 2.83 |  |  |
| NM_001150 | 1.78 | 2.33 | 2.35 |  |  |
| NM_006465 | 2.28 | 3.02 | 3.02 |  |  |
| NM_005054 | 2.37 | 3.22 | 3.17 |  |  |
| NM_001109 | 4.18 | 5.73 | 5.69 |  |  |
| NM_206925 | 1.30 | 1.77 | 1.77 |  |  |
| NM_001146028 | 2.20 | 3.31 | 2.97 |  |  |
| NM_000700 | 1.59 | 2.35 | 2.06 |  |  |
| NM_138554 | 1.39 | 2.07 | 1.84 |  |  |
| NM_000598 | 5.73 | 7.82 | 6.70 |  |  |
| NM_001007794 | 3.39 | 4.68 | 4.14 |  |  |
| NM_001169111 | 2.30 | 3.29 | 2.86 |  |  |
| NM_133467 | 1.72 | 2.41 | 2.19 |  |  |
| NM_201381 | 1.58 | 2.19 | 2.01 |  |  |
| NM_001013398 | 3.02 | 4.90 | 4.21 |  |  |
| NM_001080437 | 2.71 | 4.45 | 3.81 |  |  |
| NM_001191037 | 1.25 | 2.04 | 1.77 |  |  |
| NM_001197260 | 2.26 | 3.63 | 3.16 |  |  |
| NM_006066 | 3.24 | 5.44 | 4.67 |  |  |
| NM_020370 | 3.10 | 5.35 | 4.66 |  |  |
| NM_013433 | 1.42 | 2.40 | 1.97 |  |  |
| NM_015925 | 3.76 | 6.37 | 5.24 |  |  |
| NM_016948 | 2.41 | 4.19 | 3.39 |  |  |
| NM_001005377 | 3.17 | 4.89 | 3.99 |  |  |
| NM_182578 | 2.40 | 3.70 | 3.09 |  |  |
| NM_005950 | 3.08 | 4.96 | 4.03 |  |  |
| NM_025142 | 1.72 | 2.81 | 2.31 |  |  |
| NM_001122752 | 1.11 | 1.76 | 1.29 |  |  |
| NM_000640 | 4.92 | 7.59 | 5.40 |  |  |
| NM_001195387 | 2.36 | 3.60 | 2.57 |  |  |
| NM_002203 | 1.19 | 1.80 | 1.25 |  |  |
| NM_006663 | 3.08 | 4.48 | 3.29 |  |  |
| NM_003612 | 1.33 | 2.03 | 1.57 |  |  |
| NM_004561 | 2.85 | 4.43 | 3.39 |  |  |
| NM_001033553 | 3.99 | 6.18 | 4.84 |  |  |
| NM_153449 | 1.52 | 2.38 | 1.86 |  |  |
| NM_005291 | 2.93 | 4.22 | 3.46 |  |  |
| NM_001171624 | 3.10 | 4.40 | 3.47 |  |  |
| NM_024852 | 1.11 | 1.57 | 1.27 |  |  |
| NM_033274 | 2.72 | 3.88 | 3.09 |  |  |
| NM_178354 | 5.03 | 7.40 | 5.83 |  |  |
| NM_001163771 | 2.69 | 4.74 | 3.53 |  |  |
| NM_005449 | 2.81 | 4.81 | 3.73 |  |  |
| NM_019103 | 1.21 | 2.03 | 1.57 |  |  |
| NM_001647 | 2.87 | 4.86 | 3.40 |  |  |
| NM_006533 | 2.72 | 4.54 | 3.12 |  |  |
| NM_172219 | 2.49 | 4.33 | 3.10 |  |  |
| NM_001042422 | 4.36 | 5.23 | 3.41 |  |  |
| NM_001135776 | 3.25 | 4.04 | 2.67 |  |  |
| NM_017453 | 1.35 | 1.67 | 1.08 |  |  |
| NM_001099 | 4.22 | 5.00 | 3.56 |  |  |
| NM_007011 | 3.03 | 3.65 | 2.55 |  |  |
| NM_015122 | 2.96 | 3.45 | 2.38 |  |  |
| NM_002425 | 3.40 | 3.65 | 2.38 |  |  |
| NM_001172700 | 1.42 | 1.63 | 1.02 |  |  |
| NM_173593 | 3.00 | 3.45 | 2.21 |  |  |
| NM_001033554 | 4.45 | 5.27 | 3.02 |  |  |
| NM_021127 | 2.20 | 2.62 | 1.57 |  |  |
| NM_207361 | 3.43 | 3.98 | 2.19 |  |  |
| NM_001001936 | 2.56 | 3.44 | 2.15 |  |  |
| NM_012429 | 1.62 | 2.27 | 1.41 |  |  |
| NM_001197244 | 3.75 | 4.87 | 2.89 |  |  |
| NM_000333 | 1.60 | 2.16 | 1.27 |  |  |
| NM_205848 | 4.21 | 5.61 | 3.29 |  |  |
| NM_001199355 | 1.83 | 2.40 | 1.37 |  |  |
| NM_016463 | 1.59 | 2.10 | 1.15 |  |  |
| NM_025240 | 2.29 | 2.97 | 1.66 |  |  |
| NM_198591 | 1.68 | 2.41 | 1.29 |  |  |
| NM_199418 | 2.67 | 3.79 | 2.17 |  |  |
| NM_001080421 | 3.31 | 4.02 | 2.07 |  |  |
| NM_003247 | 2.55 | 3.20 | 1.62 |  |  |
| NM_001159554 | 1.99 | 2.63 | 1.20 |  |  |
| NM_006216 | 2.38 | 2.97 | 1.38 |  |  |
| NM_001127223 | 2.86 | 3.17 | 1.56 |  |  |
| NM_152495 | 4.25 | 4.64 | 2.23 |  |  |
| NM_014656 | 4.54 | 5.27 | 2.37 |  |  |
| NM_206866 | 2.15 | 2.48 | 1.11 |  |  |
| NM_030788 | 3.54 | 3.80 | 2.06 |  |  |
| NM_173844 | 1.75 | 1.97 | 1.03 |  |  |
| NM_001136528 | 2.63 | 2.93 | 1.16 |  |  |
| NM_183004 | 2.83 | 3.26 | 1.01 |  |  |
| NM_001040107 | 3.19 | 4.92 | 1.98 |  |  |
| NM_002220 | 1.69 | 2.64 | 1.12 |  |  |
| NM_013406 | 1.60 | 2.72 | 1.09 |  |  |
| NM_182763 | 2.28 | 3.58 | 1.67 |  |  |
| NM_006273 | 2.78 | 4.04 | 1.55 |  |  |
| NM_022042 | 2.11 | 3.00 | 1.02 |  |  |
| NM_001193314 | 2.69 | 3.75 | 1.12 |  |  |
| NM_194463 | 2.47 | 3.38 | 1.02 |  |  |
| NM_001100398 | 2.00 | 2.44 | 3.06 |  |  |
| NM_001166116 | 2.64 | 3.37 | 4.18 |  |  |
| NM_001193654 | 1.23 | 1.57 | 1.97 |  |  |
| NM_005442 | 1.33 | 1.67 | 2.05 |  |  |
| NM_001120 | 1.61 | 1.74 | 2.41 |  |  |
| NM_006042 | 2.27 | 2.64 | 3.61 |  |  |
| NM_024734 | 1.61 | 1.81 | 2.53 |  |  |
| NM_024769 | 4.11 | 4.79 | 6.20 |  |  |
| NM_001130055 | 2.41 | 2.72 | 3.15 |  |  |
| NM_001085368 | 1.20 | 1.33 | 1.52 |  |  |
| NM_001100122 | 3.20 | 3.50 | 4.06 |  |  |
| NM_005996 | 3.48 | 3.79 | 4.47 |  |  |
| NM_001172832 | 3.47 | 3.99 | 4.45 |  |  |
| NM_001134772 | 1.41 | 1.51 | 1.70 |  |  |
| NM_173354 | 1.57 | 1.68 | 1.89 |  |  |
| NM_014622 | 1.73 | 1.83 | 2.05 |  |  |
| NM_021145 | 3.17 | 3.43 | 3.76 |  |  |
| NM_001162895 | 3.88 | 4.87 | 5.34 |  |  |
| NM_001257 | 2.15 | 2.69 | 2.89 |  |  |
| NM_003733 | 3.67 | 4.65 | 4.91 |  |  |
| NM_014220 | 4.71 | 5.76 | 6.25 |  |  |
| NM_015892 | 5.14 | 6.16 | 6.70 |  |  |
| NM_021226 | 3.12 | 3.76 | 4.15 |  |  |
| NM_001007270 | 2.65 | 3.02 | 3.81 |  |  |
| NM_002698 | 3.40 | 3.90 | 4.71 |  |  |
| NM_001168398 | 1.31 | 1.44 | 1.77 |  |  |
| NM_004636 | 5.14 | 5.74 | 7.06 |  |  |
| NM_203411 | 1.90 | 2.12 | 2.62 |  |  |
| NM_001144997 | 3.63 | 4.35 | 5.11 |  |  |
| NM_001191022 | 1.97 | 2.34 | 2.76 |  |  |
| NM_001039650 | 1.20 | 1.42 | 1.71 |  |  |
| NM_003512 | 1.55 | 1.85 | 2.22 |  |  |
| NM_183235 | 1.09 | 1.28 | 1.57 |  |  |
| NM_001190764 | 1.38 | 1.72 | 1.99 |  |  |
| NM_199050 | 3.15 | 3.89 | 4.50 |  |  |
| NM_000296 | 1.41 | 1.96 | 2.06 |  |  |
| NM_001142777 | 1.19 | 1.63 | 1.78 |  |  |
| NM_001145023 | 1.29 | 1.76 | 1.91 |  |  |
| NM_001102454 | 3.69 | 4.74 | 5.56 |  |  |
| NM_032849 | 3.56 | 4.73 | 5.38 |  |  |
| NM_032420 | 4.12 | 5.29 | 5.90 |  |  |
| NM_002317 | 1.09 | 1.47 | 1.74 |  |  |
| NM_053026 | 3.55 | 4.91 | 5.65 |  |  |
| NM_138720 | 1.69 | 2.38 | 2.83 |  |  |
| NM_001718 | 4.29 | 3.43 | 5.05 |  |  |
| NM_001011709 | 1.84 | 1.57 | 2.29 |  |  |
| NM_001172567 | 1.60 | 1.36 | 2.02 |  |  |
| NM_203305 | 1.49 | 1.30 | 1.85 |  |  |
| NM_015296 | 4.33 | 4.29 | 5.95 |  |  |
| NM_030582 | 3.41 | 3.16 | 4.48 |  |  |
| NM_020351 | 3.56 | 3.07 | 4.73 |  |  |
| NM_024007 | 4.32 | 3.70 | 5.70 |  |  |
| NM_032823 | 1.22 | 1.12 | 1.68 |  |  |
| NM_152527 | 2.67 | 2.47 | 3.81 |  |  |
| NM_203403 | 2.27 | 2.03 | 3.19 |  |  |
| NM_001042545 | 1.23 | 1.08 | 2.41 |  |  |
| NM_001142326 | 2.46 | 2.33 | 4.90 |  |  |
| NM_182910 | 1.36 | 1.27 | 2.62 |  |  |
| NM_001130110 | 1.43 | 1.27 | 2.46 |  |  |
| NM_020631 | 2.73 | 2.42 | 4.70 |  |  |
| NM_001099639 | 1.02 | 1.09 | 1.67 |  |  |
| NM_014421 | 2.36 | 2.58 | 3.93 |  |  |
| NM_001197122 | 1.06 | 1.07 | 1.63 |  |  |
| NM_014256 | 2.25 | 2.24 | 3.51 |  |  |
| NM_180699 | 1.34 | 1.30 | 2.14 |  |  |
| NM_001201546 | 1.97 | 2.04 | 3.46 |  |  |
| NM_006829 | 4.05 | 4.19 | 7.09 |  |  |
| NM_022159 | 3.69 | 3.90 | 6.42 |  |  |
| NM_014399 | 2.76 | 2.99 | 5.06 |  |  |
| NM_001017528 | 1.34 | 1.48 | 2.58 |  |  |
| NM_001145671 | 1.92 | 2.42 | 4.07 |  |  |
| NM_053031 | 2.82 | 3.35 | 5.55 |  |  |
| NM_213569 | 2.17 | 2.68 | 4.33 |  |  |
| NM_001195683 | 2.29 | 3.22 | 4.44 |  |  |
| NM_001102367 | 1.89 | 2.78 | 3.73 |  |  |
| NM_006497 | 3.09 | 4.58 | 6.25 |  |  |
| NM_013372 | 2.49 | 3.56 | 5.07 |  |  |
| NM_001957 | 3.38 | 4.61 | 6.07 |  |  |
| NM_017436 | 3.22 | 4.48 | 5.99 |  |  |
| NM_002448 | 1.28 | 1.86 | 2.36 |  |  |
| NM_022164 | 4.29 | 6.08 | 7.74 |  |  |
| NM_198855 | 2.47 | 3.51 | 4.49 |  |  |
| NM_001554 | 3.53 | 4.58 | 6.30 |  |  |
| NM_004370 | 2.12 | 2.74 | 3.81 |  |  |
| NM_003510 | 2.38 | 2.83 | 4.11 |  |  |
| NM_016260 | 2.11 | 2.57 | 3.65 |  |  |
| NM_178584 | 1.32 | 1.60 | 2.35 |  |  |
| NM_020200 | 2.24 | 2.77 | 4.17 |  |  |
| NM_001061 | 1.20 | 7.60 | 6.84 |  |  |
| NM_002422 | 1.09 | 7.42 | 6.06 |  |  |
| NM_004925 | 1.37 | 7.34 | 6.27 |  |  |
| NM_009587 | 1.23 | 6.16 | 5.14 |  |  |
| NM_001003396 | 1.36 | 5.36 | 4.26 |  |  |
| NM_001142293 | 1.37 | 5.41 | 4.27 |  |  |
| NM_001143958 | 1.51 | 5.33 | 4.38 |  |  |
| NM_006063 | 1.03 | 3.95 | 3.27 |  |  |
| NM_000224 | 1.38 | 6.05 | 4.97 |  |  |
| NM_014936 | 1.31 | 5.82 | 4.69 |  |  |
| NM_152997 | 2.14 | 8.92 | 7.38 |  |  |
| NM_001009991 | 1.00 | 3.17 | 3.03 |  |  |
| NM_001035516 | 2.38 | 7.92 | 7.42 |  |  |
| NM_001165975 | 1.27 | 4.08 | 3.75 |  |  |
| NM_003422 | 1.12 | 3.57 | 3.31 |  |  |
| NM_000591 | 1.97 | 6.59 | 5.72 |  |  |
| NM_012153 | 1.76 | 6.43 | 5.59 |  |  |
| NM_017439 | 1.08 | 3.79 | 3.38 |  |  |
| NM_001184762 | 1.03 | 3.95 | 3.52 |  |  |
| NM_020299 | 1.37 | 5.21 | 4.76 |  |  |
| NM_006674 | 1.81 | 7.99 | 7.37 |  |  |
| NM_173086 | 2.18 | 9.36 | 8.48 |  |  |
| NM_000689 | 1.50 | 7.32 | 5.53 |  |  |
| NM_001199837 | 1.15 | 5.86 | 4.31 |  |  |
| NM_152529 | 1.29 | 6.60 | 4.73 |  |  |
| NM_001003397 | 1.20 | 4.79 | 3.42 |  |  |
| NM_005613 | 1.77 | 7.86 | 5.67 |  |  |
| NM_019554 | 1.16 | 5.03 | 3.42 |  |  |
| NM_030923 | 1.65 | 7.38 | 4.92 |  |  |
| NM_001001389 | 1.33 | 3.17 | 2.40 |  |  |
| NM_001165 | 2.23 | 5.16 | 3.86 |  |  |
| NM_001040647 | 1.04 | 2.61 | 1.98 |  |  |
| NM_001145770 | 2.40 | 6.07 | 4.43 |  |  |
| NM_001185 | 1.28 | 3.25 | 2.38 |  |  |
| NM_005139 | 1.27 | 3.27 | 2.37 |  |  |
| NM_182924 | 1.35 | 3.50 | 2.55 |  |  |
| NM_006096 | 1.11 | 3.03 | 2.24 |  |  |
| NM_138350 | 1.29 | 3.42 | 2.58 |  |  |
| NM_001039362 | 1.93 | 5.76 | 4.51 |  |  |
| NM_005501 | 1.38 | 4.50 | 3.56 |  |  |
| NM_001195192 | 1.37 | 4.12 | 3.56 |  |  |
| NM_004418 | 1.44 | 4.13 | 3.56 |  |  |
| NM_178834 | 1.07 | 3.15 | 2.63 |  |  |
| NM_000572 | 1.59 | 4.06 | 3.34 |  |  |
| NM_001062 | 2.17 | 5.52 | 4.63 |  |  |
| NM_001002031 | 1.62 | 4.34 | 3.62 |  |  |
| NM_001195102 | 1.51 | 4.05 | 3.31 |  |  |
| NM_052889 | 1.09 | 2.79 | 2.39 |  |  |
| NM_207311 | 1.94 | 4.85 | 4.20 |  |  |
| NM_001080779 | 1.48 | 4.05 | 3.18 |  |  |
| NM_017614 | 1.86 | 4.83 | 3.79 |  |  |
| NM_003532 | 1.37 | 3.08 | 2.49 |  |  |
| NM_004753 | 1.01 | 2.30 | 1.83 |  |  |
| NM_018349 | 1.70 | 4.04 | 3.31 |  |  |
| NM_020801 | 1.82 | 4.30 | 3.49 |  |  |
| NM_022873 | 1.34 | 3.18 | 2.68 |  |  |
| NM_153023 | 1.32 | 3.04 | 2.54 |  |  |
| NM_001080745 | 1.11 | 3.80 | 2.32 |  |  |
| NM_001171138 | 1.29 | 4.67 | 2.96 |  |  |
| NM_173454 | 1.15 | 4.28 | 2.67 |  |  |
| NM_001145138 | 1.02 | 3.36 | 2.29 |  |  |
| NM_001025231 | 2.37 | 7.53 | 5.38 |  |  |
| NM_032211 | 2.61 | 8.38 | 6.01 |  |  |
| NM_020428 | 1.37 | 4.10 | 2.89 |  |  |
| NM_001003943 | 1.49 | 3.96 | 2.52 |  |  |
| NM_152754 | 1.45 | 4.07 | 2.54 |  |  |
| NM_001193484 | 1.69 | 4.90 | 3.28 |  |  |
| NM_173570 | 1.54 | 4.12 | 2.78 |  |  |
| NM_000599 | 1.05 | 8.16 | 9.41 |  |  |
| NM_002658 | 1.05 | 7.51 | 7.57 |  |  |
| NM_006762 | 1.47 | 10.61 | 10.69 |  |  |
| NM_006945 | 1.03 | 8.46 | 8.46 |  |  |
| NM_019111 | 1.28 | 13.01 | 13.18 |  |  |
| NM_000358 | 1.02 | 5.62 | 5.58 |  |  |
| NM_001465 | 1.10 | 6.71 | 6.48 |  |  |
| NM_001171799 | 1.17 | 4.93 | 4.87 |  |  |
| NM_001040439 | 1.05 | 4.67 | 4.55 |  |  |
| NM_002535 | 1.02 | 4.83 | 4.68 |  |  |
| NM_001710 | 1.53 | 7.16 | 7.16 |  |  |
| NM_003974 | 1.18 | 5.43 | 5.37 |  |  |
| NM_001128922 | 1.33 | 6.87 | 6.55 |  |  |
| NM_001174105 | 1.61 | 8.15 | 7.68 |  |  |
| NM_002705 | 1.17 | 5.81 | 5.49 |  |  |
| NM_003955 | 1.38 | 6.84 | 6.50 |  |  |
| NM_001077442 | 1.03 | 3.50 | 3.58 |  |  |
| NM_006851 | 1.48 | 4.90 | 5.09 |  |  |
| NM_001146273 | 1.41 | 4.66 | 5.08 |  |  |
| NM_001453 | 1.56 | 5.30 | 5.68 |  |  |
| NM_006169 | 2.56 | 8.62 | 9.24 |  |  |
| NM_004120 | 1.60 | 5.49 | 6.05 |  |  |
| NM_003246 | 1.52 | 4.84 | 5.35 |  |  |
| NM_032564 | 1.46 | 4.50 | 4.84 |  |  |
| NM_033255 | 1.54 | 4.89 | 5.28 |  |  |
| NM_001104558 | 1.34 | 5.19 | 5.23 |  |  |
| NM_002523 | 1.12 | 4.48 | 4.53 |  |  |
| NM_032413 | 1.13 | 4.43 | 4.52 |  |  |
| NM_004355 | 3.62 | 13.45 | 13.41 |  |  |
| NM_018300 | 1.73 | 6.28 | 6.26 |  |  |
| NM_023003 | 1.55 | 5.99 | 5.74 |  |  |
| NM_138440 | 1.00 | 3.54 | 3.40 |  |  |
| NM_001136140 | 1.08 | 4.28 | 4.43 |  |  |
| NM_001198 | 1.33 | 5.58 | 5.83 |  |  |
| NM_003560 | 1.16 | 4.98 | 5.11 |  |  |
| NM_003786 | 1.09 | 4.19 | 4.46 |  |  |
| NM_032330 | 1.13 | 4.69 | 5.06 |  |  |
| NM_003006 | 1.25 | 6.66 | 7.03 |  |  |
| NM_001878 | 1.78 | 8.10 | 8.61 |  |  |
| NM_130386 | 1.33 | 5.96 | 6.33 |  |  |
| NM_004131 | 1.43 | 6.99 | 7.23 |  |  |
| NM_199424 | 1.13 | 5.33 | 5.56 |  |  |
| NM_001168682 | 1.16 | 5.13 | 5.67 |  |  |
| NM_006820 | 1.46 | 5.64 | 6.32 |  |  |
| NM_001142343 | 1.11 | 4.60 | 5.13 |  |  |
| NM_145236 | 1.29 | 5.14 | 5.81 |  |  |
| NM_002275 | 1.62 | 6.58 | 7.57 |  |  |
| NM_057166 | 2.00 | 8.07 | 9.25 |  |  |
| NM_201442 | 1.46 | 7.74 | 8.69 |  |  |
| NM_000877 | 1.14 | 5.12 | 6.11 |  |  |
| NM_000442 | 2.08 | 7.52 | 9.06 |  |  |
| NM_001128424 | 1.81 | 6.70 | 8.21 |  |  |
| NM_001335 | 1.33 | 5.32 | 6.46 |  |  |
| NM_001144999 | 1.01 | 3.86 | 4.91 |  |  |
| NM_019055 | 1.34 | 4.80 | 6.30 |  |  |
| NM_001164178 | 1.52 | 4.61 | 5.63 |  |  |
| NM_174919 | 1.29 | 4.11 | 4.99 |  |  |
| NM_031476 | 1.82 | 5.96 | 7.45 |  |  |
| NM_017709 | 1.68 | 5.92 | 6.89 |  |  |
| NM_198449 | 1.53 | 4.78 | 5.54 |  |  |
| NM_002165 | 2.06 | 5.98 | 7.65 |  |  |
| NM_015833 | 1.03 | 2.88 | 3.82 |  |  |
| NM_052960 | 1.47 | 4.54 | 6.02 |  |  |
| NM_000530 | 1.89 | 5.53 | 5.96 |  |  |
| NM_001085423 | 1.56 | 4.07 | 4.31 |  |  |
| NM_001190317 | 1.61 | 4.38 | 4.75 |  |  |
| NM_001953 | 1.22 | 3.25 | 3.55 |  |  |
| NM_000064 | 2.66 | 6.49 | 7.72 |  |  |
| NM_001030312 | 1.23 | 2.90 | 3.32 |  |  |
| NM_001353 | 1.30 | 3.00 | 3.47 |  |  |
| NM_001113755 | 1.21 | 2.91 | 3.40 |  |  |
| NM_001171816 | 1.55 | 3.62 | 4.27 |  |  |
| NM_001077484 | 2.28 | 5.45 | 6.11 |  |  |
| NM_001199814 | 1.32 | 3.26 | 3.63 |  |  |
| NM_001785 | 1.75 | 4.39 | 4.93 |  |  |
| NM_001024216 | 1.43 | 3.70 | 4.21 |  |  |
| NM_001113347 | 1.73 | 4.47 | 5.05 |  |  |
| NM_001803 | 2.95 | 7.49 | 8.55 |  |  |
| NM_001100818 | 1.77 | 4.41 | 5.13 |  |  |
| NM_004195 | 1.56 | 3.93 | 4.54 |  |  |
| NM_005195 | 1.46 | 3.68 | 4.24 |  |  |
| NM_001004354 | 1.66 | 4.36 | 5.39 |  |  |
| NM_004031 | 1.15 | 2.87 | 3.53 |  |  |
| NM_012302 | 1.22 | 3.23 | 3.83 |  |  |
| NM_019032 | 1.35 | 3.71 | 4.47 |  |  |
| NM_000428 | 2.16 | 4.93 | 6.45 |  |  |
| NM_001005752 | 1.19 | 2.74 | 3.56 |  |  |
| NM_016580 | 1.96 | 4.29 | 5.63 |  |  |
| NM_007038 | 1.65 | 3.39 | 4.67 |  |  |
| NM_016563 | 1.68 | 3.64 | 4.91 |  |  |
| NM_020130 | 2.72 | 6.17 | 7.66 |  |  |
| NM_177552 | 2.06 | 4.46 | 5.65 |  |  |
| NM_001031717 | 1.41 | 2.21 | 2.79 |  |  |
| NM_019027 | 1.84 | 3.13 | 3.86 |  |  |
| NM_014718 | 2.04 | 3.38 | 4.31 |  |  |
| NM_080550 | 2.06 | 3.50 | 4.44 |  |  |
| NM_003644 | 1.72 | 2.94 | 4.09 |  |  |
| NM_002404 | 3.38 | 6.21 | 8.36 |  |  |
| NM_020962 | 1.82 | 3.21 | 4.36 |  |  |
| NM_006352 | 1.24 | 2.18 | 2.86 |  |  |
| NM_001190809 | 1.63 | 3.30 | 4.15 |  |  |
| NM_001873 | 2.76 | 5.37 | 7.05 |  |  |
| NM_013351 | 1.81 | 3.45 | 4.32 |  |  |
| NM_001198898 | 1.36 | 2.57 | 3.20 |  |  |
| NM_152837 | 2.10 | 3.98 | 4.94 |  |  |
| NM_213632 | 2.12 | 4.08 | 5.05 |  |  |
| NM_199263 | 1.66 | 3.07 | 3.85 |  |  |
| NM_053032 | 2.72 | 5.66 | 6.58 |  |  |
| NM_032464 | 2.06 | 4.22 | 5.02 |  |  |
| NM_173217 | 1.76 | 3.59 | 4.33 |  |  |
| NM_001031803 | 1.98 | 3.77 | 4.08 |  |  |
| NM_000962 | 2.39 | 4.58 | 4.86 |  |  |
| NM_003954 | 1.18 | 2.29 | 2.42 |  |  |
| NM_001145009 | 2.72 | 5.16 | 5.39 |  |  |
| NM_001113756 | 2.28 | 4.25 | 4.34 |  |  |
| NM_001190349 | 2.98 | 5.31 | 5.63 |  |  |
| NM_197974 | 1.48 | 2.69 | 2.84 |  |  |
| NM_001077195 | 1.63 | 3.05 | 3.39 |  |  |
| NM_001142575 | 1.20 | 2.31 | 2.54 |  |  |
| NM_000600 | 3.53 | 6.10 | 6.96 |  |  |
| NM_006495 | 1.40 | 2.44 | 2.85 |  |  |
| NM_033429 | 2.41 | 4.32 | 4.78 |  |  |
| NM_016084 | 3.14 | 5.81 | 6.78 |  |  |
| NM_001130692 | 2.52 | 4.28 | 4.53 |  |  |
| NM_001173473 | 1.96 | 3.38 | 3.55 |  |  |
| NM_033439 | 3.92 | 6.64 | 6.92 |  |  |
| NM_018050 | 1.57 | 2.63 | 2.84 |  |  |
| NM_057167 | 3.79 | 6.05 | 6.66 |  |  |
| NM_001159920 | 2.64 | 4.28 | 5.03 |  |  |
| NM_003713 | 1.86 | 2.88 | 3.38 |  |  |
| NM_003956 | 3.41 | 5.25 | 6.14 |  |  |
| NM_015187 | 2.60 | 4.17 | 4.80 |  |  |
| NM_182915 | 1.94 | 3.08 | 3.54 |  |  |
| NM_001199881 | 2.71 | 4.15 | 3.87 |  |  |
| NM_001008844 | 3.89 | 6.55 | 5.92 |  |  |
| NM_000887 | 4.56 | 7.41 | 6.72 |  |  |
| NM_001164821 | 2.77 | 4.42 | 4.02 |  |  |
| NM_015163 | 3.11 | 5.05 | 4.64 |  |  |
| NM_001295 | 3.96 | 6.24 | 5.94 |  |  |
| NM_001193307 | 3.17 | 5.22 | 4.98 |  |  |
| NM_033023 | 2.48 | 4.01 | 3.83 |  |  |
| NM_001003794 | 2.33 | 3.55 | 3.77 |  |  |
| NM_014632 | 1.30 | 1.98 | 2.10 |  |  |
| NM_004235 | 2.99 | 4.52 | 4.74 |  |  |
| NM_001066 | 3.00 | 4.55 | 4.57 |  |  |
| NM_002247 | 3.35 | 5.31 | 5.23 |  |  |
| NM_020820 | 3.96 | 6.18 | 6.18 |  |  |
| NM_001199434 | 2.72 | 4.41 | 4.43 |  |  |
| NM_001901 | 4.00 | 6.53 | 6.48 |  |  |
| NM_032108 | 4.23 | 6.67 | 6.82 |  |  |
| NM_001307 | 2.42 | 4.42 | 4.12 |  |  |
| NM_001146105 | 2.83 | 4.89 | 4.63 |  |  |
| NM_004415 | 4.10 | 7.04 | 6.74 |  |  |
| NM_002353 | 4.43 | 7.48 | 7.17 |  |  |
| NM_001142426 | 3.98 | 7.14 | 6.93 |  |  |
| NM_001031716 | 1.16 | 2.08 | 1.98 |  |  |
| NM_020307 | 1.07 | 1.91 | 1.83 |  |  |
| NM_001198764 | 3.42 | 5.96 | 5.77 |  |  |
| NM_002925 | 3.05 | 5.33 | 5.11 |  |  |
| NM_002064 | 1.70 | 2.93 | 2.86 |  |  |
| NM_032521 | 1.03 | 1.78 | 1.72 |  |  |
| NM_003012 | 3.15 | 5.90 | 5.78 |  |  |
| NM_016352 | 2.74 | 5.30 | 5.08 |  |  |
| NM_020190 | 4.57 | 8.75 | 8.03 |  |  |
| NM_032148 | 1.27 | 2.46 | 2.28 |  |  |
| NM_173496 | 1.61 | 3.19 | 2.88 |  |  |
| NM_198213 | 1.80 | 3.57 | 3.26 |  |  |
| NM_001720 | 2.94 | 6.21 | 4.91 |  |  |
| NM_001002843 | 1.67 | 3.17 | 2.37 |  |  |
| NM_005923 | 1.21 | 2.36 | 1.86 |  |  |
| NM_152574 | 1.38 | 2.77 | 2.10 |  |  |
| NM_001570 | 1.89 | 3.52 | 3.02 |  |  |
| NM_001717 | 1.97 | 3.77 | 3.32 |  |  |
| NM_005502 | 1.05 | 1.96 | 1.73 |  |  |
| NM_015608 | 1.46 | 2.70 | 2.41 |  |  |
| NM_020183 | 2.27 | 4.07 | 3.65 |  |  |
| NM_001202413 | 1.31 | 2.48 | 2.02 |  |  |
| NM_001218 | 2.86 | 5.36 | 4.47 |  |  |
| NM_021199 | 1.28 | 2.47 | 2.02 |  |  |
| NM_182962 | 2.73 | 5.29 | 4.35 |  |  |
| NM_198275 | 1.96 | 3.85 | 3.17 |  |  |
| NM_014452 | 2.97 | 6.01 | 5.10 |  |  |
| NM_197955 | 2.99 | 6.02 | 5.11 |  |  |
| NM_176805 | 2.14 | 4.52 | 3.89 |  |  |
| NM_001135556 | 1.57 | 3.60 | 3.37 |  |  |
| NM_002961 | 3.17 | 7.03 | 6.53 |  |  |
| NM_001143886 | 1.79 | 3.71 | 3.33 |  |  |
| NM_002185 | 3.00 | 6.44 | 5.84 |  |  |
| NM_001126058 | 2.41 | 5.50 | 4.76 |  |  |
| NM_001146333 | 2.20 | 4.85 | 4.27 |  |  |
| NM_007139 | 1.88 | 4.35 | 3.86 |  |  |
| NM_001077241 | 1.40 | 2.89 | 2.78 |  |  |
| NM_004106 | 5.27 | 10.77 | 10.27 |  |  |
| NM_001197293 | 1.87 | 3.96 | 3.75 |  |  |
| NM_003467 | 3.80 | 7.83 | 7.78 |  |  |
| NM_002728 | 1.64 | 3.56 | 3.50 |  |  |
| NM_005257 | 1.59 | 3.43 | 3.39 |  |  |
| NM_014143 | 1.56 | 3.32 | 3.29 |  |  |
| NM_022117 | 1.04 | 2.20 | 2.20 |  |  |
| NM_001195016 | 3.18 | 7.21 | 7.11 |  |  |
| NM_199001 | 2.24 | 5.36 | 5.25 |  |  |
| NM_001037332 | 1.64 | 3.36 | 3.55 |  |  |
| NM_001199622 | 2.57 | 5.43 | 5.69 |  |  |
| NM_014266 | 3.21 | 6.77 | 7.02 |  |  |
| NM_003999 | 2.05 | 4.63 | 4.76 |  |  |
| NM_005178 | 1.38 | 3.01 | 3.11 |  |  |
| NM_001005526 | 1.49 | 3.42 | 3.73 |  |  |
| NM_022153 | 2.87 | 6.68 | 7.12 |  |  |
| NM_001167582 | 1.34 | 2.94 | 3.13 |  |  |
| NM_003469 | 2.13 | 4.61 | 4.98 |  |  |
| NM_005252 | 1.32 | 2.88 | 3.15 |  |  |
| NM_004509 | 1.20 | 2.65 | 2.93 |  |  |
| NM_014467 | 1.23 | 2.68 | 2.99 |  |  |
| NM_002298 | 1.57 | 4.43 | 4.17 |  |  |
| NM_018371 | 1.64 | 4.56 | 4.27 |  |  |
| NM_002638 | 3.89 | 11.08 | 10.64 |  |  |
| NM_022358 | 1.33 | 3.79 | 3.61 |  |  |
| NM_005555 | 3.67 | 9.69 | 9.06 |  |  |
| NM_005554 | 4.30 | 11.52 | 10.80 |  |  |
| NM_198082 | 1.01 | 2.72 | 2.54 |  |  |
| NM_000246 | 2.58 | 6.84 | 6.91 |  |  |
| NM_021181 | 2.17 | 5.99 | 6.14 |  |  |
| NM_152245 | 2.09 | 5.68 | 5.80 |  |  |
| NM_025239 | 1.47 | 3.99 | 3.95 |  |  |
| NM_176816 | 1.34 | 3.71 | 3.67 |  |  |
| NM_003500 | 1.56 | 3.82 | 3.91 |  |  |
| NM_016205 | 1.86 | 4.67 | 4.75 |  |  |
| NM_080657 | 2.29 | 6.01 | 5.95 |  |  |
| NM_199282 | 2.25 | 5.72 | 5.64 |  |  |
| NM_000825 | 1.05 | 2.06 | 3.18 |  |  |
| NM_001111112 | 1.25 | 2.42 | 3.74 |  |  |
| NM_001134445 | 1.61 | 3.16 | 4.98 |  |  |
| NM_001185058 | 1.34 | 2.80 | 4.28 |  |  |
| NM_016438 | 1.12 | 2.14 | 3.50 |  |  |
| NM_000627 | 2.21 | 4.12 | 6.01 |  |  |
| NM_001199323 | 1.61 | 3.11 | 4.42 |  |  |
| NM_015886 | 1.08 | 1.95 | 2.98 |  |  |
| NM_001099691 | 1.55 | 2.44 | 3.83 |  |  |
| NM_006039 | 1.30 | 2.14 | 3.21 |  |  |
| NM_001145097 | 1.12 | 1.91 | 3.82 |  |  |
| NM_001290 | 1.47 | 2.43 | 4.74 |  |  |
| NM_001177876 | 1.10 | 2.12 | 3.73 |  |  |
| NM_005708 | 1.25 | 2.25 | 4.24 |  |  |
| NM_173808 | 1.31 | 2.42 | 4.42 |  |  |
| NM_015716 | 1.27 | 2.09 | 3.48 |  |  |
| NM_003528 | 1.19 | 1.76 | 3.28 |  |  |
| NM_138420 | 1.72 | 2.49 | 4.41 |  |  |
| NM_006200 | 2.01 | 2.57 | 5.19 |  |  |
| NM_178042 | 1.32 | 1.62 | 3.08 |  |  |
| NM_001159 | 1.08 | 3.68 | 5.78 |  |  |
| NM_021110 | 1.10 | 4.71 | 6.94 |  |  |
| NM_005282 | 1.01 | 2.78 | 4.29 |  |  |
| NM_005429 | 1.17 | 3.12 | 4.73 |  |  |
| NM_014840 | 1.22 | 3.29 | 5.49 |  |  |
| NM_007021 | 1.44 | 3.31 | 5.70 |  |  |
| NM_173557 | 1.05 | 2.54 | 4.27 |  |  |
| NM_001191322 | 1.19 | 2.57 | 5.20 |  |  |
| NM_017527 | 1.38 | 3.02 | 6.45 |  |  |
| NM_001442 | 1.44 | 1.95 | 7.86 |  |  |
| NM_001015892 | 2.46 | 1.34 | 5.84 |  |  |
| NM_001170782 | 1.91 | 1.12 | 4.76 |  |  |
| NM_003516 | 1.37 | 1.20 | 2.98 |  |  |
| NM_003516_dup1 | 1.37 | 1.20 | 2.98 |  |  |
| NM_001177641 | 2.05 | 1.85 | 5.85 |  |  |
| NM_014550 | 1.33 | 1.22 | 3.39 |  |  |
| NM_004029 | 1.28 | 1.28 | 3.30 |  |  |
| NM_017602 | 1.34 | 1.35 | 3.33 |  |  |
| NM_033492 | 1.47 | 1.54 | 3.98 |  |  |
| NM_197941 | 1.44 | 1.51 | 4.00 |  |  |
| NM_001128848 | -7.39 | -1.26 | -1.45 |  |  |
| NM_001031800 | -3.37 | -1.95 | -1.08 |  |  |
| NM_001080114 | -5.02 | -1.81 | -2.59 |  |  |
| NM_001199285 | -4.08 | -2.03 | -1.61 |  |  |
| NM_001199290 | -2.82 | -1.35 | -1.28 |  |  |
| NM_032711 | -6.75 | -3.05 | -2.86 |  |  |
| NM_001006640 | -4.39 | -4.39 | -1.01 |  |  |
| NM_001142599 | -5.66 | -5.66 | -1.37 |  |  |
| NM_012346 | -4.83 | -4.83 | -1.33 |  |  |
| NM_001177949 | -5.26 | -5.26 | -1.82 |  |  |
| NM_001018001 | -3.38 | -5.18 | -2.31 |  |  |
| NM_001077181 | -1.65 | -2.57 | -1.09 |  |  |
| NM_001166425 | -5.44 | -8.67 | -4.14 |  |  |
| NM_198705 | -1.69 | -2.96 | -1.01 |  |  |
| NM_001014835 | -4.05 | -5.18 | -2.05 |  |  |
| NM_001198713 | -3.95 | -4.98 | -2.02 |  |  |
| NM_153617 | -2.71 | -3.36 | -1.04 |  |  |
| NM_001145425 | -1.40 | -2.19 | -1.36 |  |  |
| NM_000264 | -2.17 | -4.73 | -2.30 |  |  |
| NM_001040630 | -1.76 | -4.09 | -2.36 |  |  |
| NM_001014832 | -1.21 | -2.87 | -1.52 |  |  |
| NM_001185011 | -1.02 | -2.57 | -1.34 |  |  |
| NM_001099652 | -1.17 | -2.65 | -1.71 |  |  |
| NM_001080529 | -1.10 | -2.20 | -1.41 |  |  |
| NM_024761 | -1.12 | -2.37 | -1.55 |  |  |
| NM_001146095 | -2.83 | -5.33 | -3.41 |  |  |
| NM_145065 | -1.19 | -2.20 | -1.45 |  |  |
| NM_001083605 | -1.13 | -5.27 | -1.75 |  |  |
| NM_001190919 | -1.10 | -5.23 | -1.94 |  |  |
| NM_001145514 | -1.32 | -5.16 | -2.02 |  |  |
| NM_001195684 | -1.14 | -4.22 | -1.24 |  |  |
| NM_017506 | -1.19 | -4.78 | -1.45 |  |  |
| NM_001001872 | -1.01 | -2.73 | -1.26 |  |  |
| NM_001167614 | -1.19 | -3.45 | -1.76 |  |  |
| NM_001193482 | -1.41 | -4.68 | -2.11 |  |  |
| NM_001098786 | -1.12 | -2.88 | -1.19 |  |  |
| NM_001170779 | -1.45 | -4.25 | -1.78 |  |  |
| NM_001184917 | -1.91 | -5.73 | -2.39 |  |  |
| NM_004726 | -1.24 | -3.45 | -1.48 |  |  |
| NM_001172667 | -1.20 | -3.58 | -1.30 |  |  |
| NM_031486 | -1.15 | -3.50 | -1.35 |  |  |
| NM_001044369 | -1.65 | -6.63 | -2.92 |  |  |
| NM_001164356 | -1.43 | -6.15 | -2.86 |  |  |
| NM_139068 | -1.39 | -6.16 | -3.07 |  |  |
| NM_001135177 | -1.17 | -4.26 | -2.27 |  |  |
| NM_017611 | -1.05 | -3.44 | -1.80 |  |  |
| NM_000381 | -2.28 | -5.88 | -1.80 |  |  |
| NM_198187 | -1.67 | -6.04 | -1.37 |  |  |
| NM_001008704 | -1.16 | -4.18 | -3.20 |  |  |
| NM_001171814 | -1.63 | -6.87 | -5.49 |  |  |
| NM_001202 | -1.24 | -5.51 | -4.25 |  |  |
| NM_004794 | -1.07 | -5.90 | -5.03 |  |  |
| NM_021197 | -1.07 | -7.26 | -5.61 |  |  |
| NM_001040694 | -1.12 | -4.66 | -2.74 |  |  |
| NM_002371 | -1.12 | -4.61 | -2.57 |  |  |
| NM_021599 | -1.19 | -5.84 | -3.54 |  |  |
| NM_002394 | -1.02 | -4.21 | -2.79 |  |  |
| NM_022442 | -1.13 | -4.61 | -3.11 |  |  |
| NM_001136469 | -1.32 | -3.60 | -2.29 |  |  |
| NM_001145657 | -1.39 | -4.31 | -2.64 |  |  |
| NM_002562 | -1.22 | -3.43 | -1.99 |  |  |
| NM_024600 | -1.03 | -3.01 | -2.09 |  |  |
| NM_144620 | -1.25 | -4.08 | -2.83 |  |  |
| NM_016291 | -1.02 | -6.87 | -1.22 |  |  |
| NM_001127687 | -1.90 | -4.55 | -3.92 |  |  |
| NM_001160176 | -2.02 | -4.43 | -3.56 |  |  |
| NM_001161454 | -1.52 | -3.13 | -2.72 |  |  |
| NM_001161452 | -1.65 | -3.77 | -3.99 |  |  |
| NM_000356 | -2.85 | -4.87 | -4.87 |  |  |
| NM_001199303 | -1.57 | -2.67 | -2.80 |  |  |
| NM_001025234 | -1.08 | -2.05 | -2.06 |  |  |
| NM_001127370 | -2.10 | -3.95 | -3.95 |  |  |
| NM_001164183 | -2.36 | -4.40 | -4.40 |  |  |
| NM_001127500 | -1.82 | -3.37 | -3.37 |  |  |
| NM_001099679 | -3.40 | -7.07 | -6.62 |  |  |
| NM_001168243 | -1.01 | -2.19 | -2.21 |  |  |
| NM_004082 | -2.90 | -6.04 | -6.04 |  |  |
| NM_018970 | -2.36 | -4.85 | -4.85 |  |  |
| NM_133341 | -1.77 | -3.52 | -3.52 |  |  |
| NM_001018075 | -3.12 | -4.35 | -4.35 |  |  |
| NM_014021 | -3.35 | -4.64 | -4.64 |  |  |
| NM_002758 | -1.20 | -1.69 | -1.62 |  |  |
| NM_001145135 | -2.48 | -3.73 | -3.73 |  |  |
| NM_024501 | -1.44 | -2.21 | -2.29 |  |  |
| NM_001102610 | -1.23 | -1.94 | -1.50 |  |  |
| NM_177477 | -1.34 | -2.13 | -1.69 |  |  |
| NM_015029 | -2.52 | -3.72 | -3.07 |  |  |
| NM_001142806 | -2.62 | -3.17 | -3.87 |  |  |
| NM_001145543 | -1.08 | -1.28 | -1.64 |  |  |
| NM_001077704 | -2.47 | -3.71 | -4.86 |  |  |
| NM_001165931 | -1.19 | -1.70 | -2.38 |  |  |
| NM_001039803 | -2.01 | -2.58 | -3.56 |  |  |
| NM_001145317 | -1.10 | -1.38 | -2.00 |  |  |
| NM_001113491 | -1.54 | -1.96 | -2.57 |  |  |
| NM_138801 | -1.10 | -1.40 | -1.84 |  |  |
| NM_202468 | -1.30 | -1.52 | -2.38 |  |  |
| NM_001136198 | -1.11 | -1.79 | -1.91 |  |  |
| NM_001141936 | -1.18 | -1.82 | -1.99 |  |  |
| NM_001115007 | -1.20 | -1.77 | -2.17 |  |  |
| NM_001184889 | -1.62 | -2.35 | -2.82 |  |  |
| NM_004734 | -1.27 | -2.04 | -2.34 |  |  |
| NM_033379 | -1.62 | -2.49 | -2.92 |  |  |
| NM_000867 | -1.19 | -2.06 | -2.37 |  |  |
| NM_016180 | -1.19 | -2.09 | -2.37 |  |  |
| NM_139278 | -1.81 | -3.17 | -3.84 |  |  |
| NM_001127371 | -1.14 | -2.36 | -2.94 |  |  |
| NM_001018137 | -1.04 | -2.98 | -3.89 |  |  |
| NM_001093772 | -1.18 | -3.57 | -4.48 |  |  |
| NM_001127505 | -1.11 | -3.25 | -4.08 |  |  |
| NM_001160011 | -1.59 | -4.16 | -5.10 |  |  |
| NM_001165414 | -1.22 | -3.07 | -3.91 |  |  |
| NM_148173 | -2.02 | -4.84 | -6.21 |  |  |
| NM_001184987 | -1.01 | -8.14 | -8.14 |  |  |
| NM_001173541 | -1.02 | -5.07 | -5.07 |  |  |
| NM_015585 | -1.33 | -6.22 | -6.22 |  |  |
| NM_005635 | -1.07 | -5.72 | -5.72 |  |  |
| NM_138375 | -1.64 | -9.55 | -9.55 |  |  |
| NM_001165031 | -1.08 | -4.51 | -4.51 |  |  |
| NM_019065 | -1.17 | -4.93 | -4.93 |  |  |
| NM_022003 | -1.06 | -4.12 | -4.12 |  |  |
| NM_002420 | -1.41 | -3.60 | -3.34 |  |  |
| NM_001085466 | -1.20 | -4.23 | -4.23 |  |  |
| NM_002385 | -1.45 | -4.97 | -4.97 |  |  |
| NM_001077395 | -1.13 | -3.46 | -3.46 |  |  |
| NM_001080442 | -1.74 | -5.67 | -5.67 |  |  |
| NM_005219 | -2.59 | -8.34 | -8.34 |  |  |
| NM_018645 | -1.10 | -3.58 | -3.54 |  |  |
| NM_032588 | -1.15 | -3.64 | -3.81 |  |  |
| NM_001195430 | -1.17 | -3.09 | -3.03 |  |  |
| NM_001160115 | -2.03 | -5.40 | -5.40 |  |  |
| NM_021602 | -1.84 | -4.78 | -4.78 |  |  |
| NM_178470 | -1.41 | -3.50 | -3.50 |  |  |
| NM_001167816 | -1.29 | -3.78 | -3.78 |  |  |
| NM_003538 | -1.55 | -4.40 | -4.40 |  |  |
| NM_015430 | -1.57 | -4.45 | -4.45 |  |  |
| NM_001199058 | -1.62 | -4.55 | -4.55 |  |  |
| NM_206933 | -1.23 | -3.42 | -3.42 |  |  |
| NM_198217 | -1.08 | -3.14 | -3.02 |  |  |
| NM_173550 | -1.18 | -3.93 | -3.59 |  |  |
| NM_001145963 | -1.30 | -4.01 | -4.46 |  |  |
| NM_001128627 | -1.51 | -5.17 | -5.58 |  |  |
| NM_153611 | -1.02 | -3.50 | -3.79 |  |  |
| NM_198952 | -1.35 | -5.16 | -5.71 |  |  |
| NM_001145318 | -1.10 | -1.69 | -2.60 |  |  |
| NM_001015891 | -1.84 | -3.36 | -4.81 |  |  |
| NM_001039614 | -1.37 | -2.44 | -3.70 |  |  |
| NM_006087 | -1.00 | -2.26 | -3.20 |  |  |
| NM_017448 | -1.19 | -2.42 | -3.67 |  |  |
| NM_001164282 | -1.90 | -3.16 | -5.20 |  |  |
| NM_003781 | -1.11 | -1.92 | -3.12 |  |  |
| NM_005059 | -1.41 | -2.54 | -4.41 |  |  |
| NM_173090 | -1.28 | -2.21 | -3.80 |  |  |
| NM_138284 | -1.23 | -2.27 | -3.75 |  |  |
| NM_001171797 | -1.03 | -3.49 | -6.35 |  |  |
| NM_001135248 | -1.56 | -3.54 | -6.00 |  |  |
| NM_212558 | -1.09 | -3.20 | -5.27 |  |  |
| NM_001184871 | -1.03 | -2.02 | -3.90 |  |  |
| NM_001167989 | -1.05 | -1.78 | -3.50 |  |  |
| NM_181265 | -1.01 | -1.82 | -3.55 |  |  |
| NM_182835 | -1.03 | -2.36 | -4.47 |  |  |
| NM_001144964 | -5.22 | -3.19 | -3.39 |  |  |
| NM_001126051 | -1.63 | -1.41 | -1.31 |  |  |
| NM_001128826 | -7.36 | -5.80 | -5.23 |  |  |
| NM_003573 | -4.83 | -3.61 | -3.49 |  |  |
| NM_002670 | -3.77 | -2.96 | -2.91 |  |  |
| NM_001135729 | -5.83 | -4.36 | -4.88 |  |  |
| NM_004482 | -1.38 | -1.02 | -1.18 |  |  |
| NM_003576 | -4.58 | -2.96 | -3.83 |  |  |
| NM_201453 | -2.72 | -1.65 | -2.02 |  |  |
| NM_001077663 | -3.75 | -3.01 | -3.75 |  |  |
| NM_001170588 | -3.79 | -3.06 | -3.79 |  |  |
| NM_001077239 | -5.32 | -4.40 | -4.89 |  |  |
| NM_017815 | -5.06 | -4.45 | -5.06 |  |  |
| NM_001122825 | -1.58 | -1.66 | -1.65 |  |  |
| NM_001099280 | -3.29 | -3.40 | -3.40 |  |  |
| NM_001042369 | -5.63 | -5.85 | -5.85 |  |  |
| NM_001177475 | -3.38 | -3.53 | -3.53 |  |  |
| NM_001200031 | -4.20 | -4.08 | -4.20 |  |  |
| NM_001077703 | -4.46 | -4.44 | -4.46 |  |  |
| NM_001144965 | -5.73 | -5.73 | -5.73 |  |  |
| NM_001017973 | -4.68 | -4.68 | -4.68 |  |  |
| NM_001193427 | -4.25 | -4.25 | -4.25 |  |  |
| NM_001193583 | -4.64 | -4.64 | -4.64 |  |  |
| NM_001199346 | -6.23 | -6.23 | -6.23 |  |  |
| NM_001171805 | -3.79 | -3.79 | -3.79 |  |  |
| NM_001005743 | -6.41 | -6.41 | -6.41 |  |  |
| NM_001127891 | -3.95 | -3.95 | -3.95 |  |  |
| NM_001173533 | -5.88 | -5.88 | -5.88 |  |  |
| NM_001153663 | -3.84 | -3.84 | -3.84 |  |  |
| NM_001161521 | -3.80 | -3.80 | -3.80 |  |  |
| NM_001146316 | -5.04 | -5.04 | -5.04 |  |  |
| NM_006872 | -3.74 | -3.74 | -3.74 |  |  |
| NM_203446 | -3.63 | -3.63 | -3.63 |  |  |
| NM_001039673 | -5.30 | -5.30 | -5.30 |  |  |
| NM_001040876 | -4.73 | -4.73 | -4.73 |  |  |
| NM_001184703 | -4.30 | -4.30 | -4.30 |  |  |
| NM_139070 | -6.12 | -6.12 | -6.12 |  |  |
| NM_001142282 | -6.57 | -6.57 | -6.57 |  |  |
| NM_001042494 | -4.52 | -4.52 | -4.52 |  |  |
| NM_001199671 | -5.30 | -5.30 | -5.30 |  |  |
| NM_018928 | -3.60 | -3.60 | -3.60 |  |  |
| NM_033498 | -5.13 | -5.13 | -5.13 |  |  |
| NM_015196 | -4.07 | -4.01 | -3.99 |  |  |
| NM_031300 | -1.20 | -1.25 | -1.18 |  |  |
| NM_001164796 | -1.01 | -1.03 | -1.12 |  |  |
| NM_052860 | -3.18 | -3.12 | -3.39 |  |  |
| NM_153697 | -1.14 | -1.11 | -1.19 |  |  |
| NM_000657 | -1.61 | -1.71 | -1.90 |  |  |
| NM_144649 | -1.25 | -1.48 | -1.64 |  |  |
| NM_004059 | -3.00 | -3.65 | -3.47 |  |  |
| NM_001177315 | -3.83 | -4.41 | -4.41 |  |  |
| NM_001199185 | -3.02 | -3.53 | -3.53 |  |  |
| NM_004377 | -3.46 | -3.86 | -3.86 |  |  |
| NM_182721 | -2.15 | -2.37 | -2.32 |  |  |
| NM_001145372 | -4.53 | -4.53 | -3.77 |  |  |
| NM_001025076 | -5.40 | -5.22 | -4.53 |  |  |
| NM_022476 | -2.05 | -1.96 | -1.69 |  |  |
| NM_201567 | -3.94 | -3.94 | -3.51 |  |  |
| NM_001163692 | -1.94 | -1.45 | -1.13 |  |  |
| NM_001017999 | -4.04 | -3.23 | -2.44 |  |  |
| NM_001199944 | -1.96 | -1.57 | -1.11 |  |  |
| NM_152904 | -4.02 | -3.19 | -2.24 |  |  |
| NM_001145356 | -2.72 | -3.37 | -2.05 |  |  |
| NM_031945 | -1.37 | -1.65 | -1.25 |  |  |
| NM_001001569 | -4.38 | -4.38 | -3.34 |  |  |
| NM_138766 | -2.69 | -2.44 | -1.84 |  |  |
| NM_001198957 | -2.11 | -2.07 | -1.39 |  |  |
| NM_057180 | -8.31 | -8.31 | -5.20 |  |  |
| NM_213560 | -2.59 | -2.73 | -1.84 |  |  |
| NM_001167733 | -3.74 | -3.54 | -1.97 |  |  |
| NM_181527 | -4.34 | -4.34 | -2.01 |  |  |
| NM_000643 | -3.95 | -1.42 | -4.39 |  |  |
| NM_001042511 | -4.35 | -1.96 | -5.01 |  |  |
| NM_001193362 | -4.68 | -1.42 | -4.68 |  |  |
| NM_001160173 | -4.47 | -1.98 | -4.47 |  |  |
| NM_001161563 | -4.72 | -2.39 | -4.72 |  |  |
| NM_001190807 | -5.98 | -3.01 | -5.98 |  |  |
| NM_001171611 | -4.61 | -2.25 | -4.61 |  |  |
| NM_022876 | -4.96 | -2.44 | -4.96 |  |  |
| NM_001005745 | -6.82 | -4.51 | -6.82 |  |  |
| NM_001163152 | -3.32 | -1.96 | -3.32 |  |  |
| NM_133335 | -2.93 | -1.56 | -2.57 |  |  |
| NM_001127227 | -5.24 | -2.04 | -3.98 |  |  |
| NM_022172 | -3.35 | -1.32 | -2.20 |  |  |
| NM_001172416 | -2.10 | -1.64 | -3.43 |  |  |
| NM_001199342 | -2.72 | -1.88 | -4.34 |  |  |
| NM_001200030 | -2.76 | -1.92 | -4.40 |  |  |
| NM_001130863 | -1.92 | -1.12 | -3.33 |  |  |
| NM_004315 | -1.98 | -1.36 | -3.71 |  |  |
| NM_017787 | -1.38 | -1.08 | -2.69 |  |  |
| NM_001164393 | -1.18 | -1.40 | -2.54 |  |  |
| NM_145060 | -1.22 | -1.18 | -2.72 |  |  |
| NM_201632 | -2.62 | -1.19 | -4.73 |  |  |
| NM_001129728 | -1.22 | -1.25 | -1.99 |  |  |
| NM_015878 | -1.16 | -1.15 | -1.93 |  |  |
| NM_182662 | -2.38 | -2.25 | -3.63 |  |  |
| NM_021914 | -1.95 | -1.77 | -2.53 |  |  |
| NM_001001487 | -1.14 | -1.93 | -5.12 |  |  |
| NM_001171795 | -1.51 | -2.06 | -5.37 |  |  |
| NM_198427 | -1.22 | -1.43 | -4.33 |  |  |
| NM_003409 | -1.20 | -1.14 | -4.70 |  |  |
| NM_001042423 | -1.40 | -1.29 | -6.63 |  |  |
| NM_212460 | -1.10 | -1.23 | -5.70 |  |  |
