# Supplementary material for: BRAFV600E remodels the melanocyte transcriptome and induces BANCR to regulate melanoma cell migration
Source: HighWire-hosted journal article supplement (doi:10.1101/gr.140061.112), 2012-05-11
Supplement: Flockhart_supplementary_table_2.docx [file Flockhart_supplementary_table_2.docx]

**Supplementary table 2**

| **ANNOTATED ncRNAs CHANGED ±2-FOLD IN ALL 3 SAMPLES** | | | | |
| --- | --- | --- | --- | --- |
|  | **Fold change (log2)** | | |  |
|  | **MC** | **Melanoma** | |  |
| **Gene ID** | **+ BRAF** | **#1** | **#2** |  |
| NR_036263 | 7.45 | 7.35 | 8.79 |  |
| NR_036442 | 3.26 | 3.94 | 3.94 |  |
| ENST00000418215 | 4.00 | 4.47 | 4.50 |  |
| ENST00000441790 | 3.75 | 2.97 | 4.05 |  |
| ENST00000437232 | 3.96 | 2.58 | 3.52 |  |
| ENST00000434063 | 2.51 | 1.54 | 2.38 |  |
| NR_036515 | 2.16 | 4.52 | 4.24 |  |
| ENST00000457747 | 2.06 | 4.10 | 3.91 |  |
| NR_001458 | 1.85 | 3.60 | 3.50 |  |
| ENST00000484550 | 1.20 | 2.57 | 2.59 |  |
| ENST00000440079 | 1.86 | 3.16 | 4.03 |  |
| ENST00000428939 | 1.36 | 2.04 | 2.30 |  |
| ENST00000445531 | 4.81 | 7.35 | 7.99 |  |
| ENST00000440578 | 1.94 | 2.58 | 4.36 |  |
| ENST00000439703 | 3.42 | 4.15 | 5.95 |  |
| ENST00000454635 | 2.38 | 4.72 | 3.03 |  |
| ENST00000441644 | 2.72 | 3.89 | 3.10 |  |
| ENST00000456896 | 3.28 | 2.74 | 1.92 |  |
| ENST00000473756 | 5.55 | 3.66 | 2.82 |  |
| ENST00000451054 | 5.26 | 2.10 | 2.45 |  |
| ENST00000456409 | 4.44 | 2.38 | 2.53 |  |
| ENST00000443593 | 4.80 | 2.98 | 1.20 |  |
| NR_037658 | -3.36 | -3.21 | -2.24 |  |
| NR_036638 | -6.81 | -6.81 | -5.29 |  |
| ENST00000416193 | -3.67 | -3.59 | -2.74 |  |
| NR_034181 | -2.65 | -2.90 | -2.85 |  |
| ENST00000469937 | -4.33 | -4.09 | -4.09 |  |
| NR_036579 | -3.98 | -5.56 | -4.69 |  |
| ENST00000437430 | -4.81 | -6.15 | -6.15 |  |
| ENST00000412606 | -1.97 | -2.99 | -3.07 |  |
| NR_026656 | -1.32 | -2.32 | -1.74 |  |
| NR_033979 | -1.08 | -2.20 | -2.95 |  |
| NR_033464 | -1.59 | -5.81 | -5.81 |  |
| ENST00000436013 | -1.70 | -3.90 | -3.90 |  |
| NR_026765 | -1.32 | -3.32 | -3.32 |  |
| NR_023938 | -1.32 | -3.32 | -3.32 |  |
| ENST00000481846 | -1.20 | -2.64 | -4.85 |  |
| ENST00000380106 | -1.62 | -5.43 | -3.12 |  |
| ENST00000416463 | -6.57 | -6.15 | -1.81 |  |
