# Supplementary material for: BRAFV600E remodels the melanocyte transcriptome and induces BANCR to regulate melanoma cell migration
Source: HighWire-hosted journal article supplement (doi:10.1101/gr.140061.112), 2012-05-11
Supplement: Flockhart_supplementary_table_3.docx [file Flockhart_supplementary_table_3.docx]

**Supplementary table 3**

| **NOVEL TRANSCRIPTS CHANGED ±2-FOLD IN ALL 3 SAMPLES** | | | |  |  |  |  |
| --- | --- | --- | --- | --- | --- | --- | --- |
|  |  |  | **Expression (RPKM value - RNAseq data)** | | | |  |
| **Scripture transcript information** | | |  | **MC +** | **Melanoma** | |  |
|  | **size** | **strand** | **Control** | **BRAF** | **#1** | **#2** | **CPC score** |
| scripture_transcript_458834 | 3798 | - | 23.18 | 46.49 | 69.36 | 55.45 | 0.378 |
| scripture_transcript_509112 | 553 | + | 10.01 | 22.30 | 149.02 | 228.77 | 0.984 |
| scripture_transcript_543843 | 402 | + | 1.53 | 53.76 | 4.37 | 4.27 | 0.842 |
| scripture_transcript_559853 | 186 | - | 31.40 | 67.22 | 75.38 | 82.48 | -1.158 |
| scripture_transcript_559854 | 190 | - | 31.30 | 65.80 | 73.79 | 80.74 | -1.159 |
| scripture_transcript_596358 | 508 | - | 0.50 | 22.93 | 37.70 | 11.66 | -0.838 |
| scripture_transcript_658767 | 1167 | + | 96.72 | 350.60 | 530.85 | 742.95 | -1.054 |
| scripture_transcript_793541 | 542 | - | 0.50 | 30.86 | 2.55 | 1.90 | 0.350 |
| scripture_transcript_878437 | 2302 | - | 8.45 | 44.10 | 56.39 | 54.98 | 5.084 |
| scripture_transcript_878438 | 2882 | - | 7.68 | 38.79 | 45.82 | 47.69 | 5.067 |
| scripture_transcript_878442 | 2222 | - | 8.62 | 45.05 | 58.02 | 56.00 | 5.088 |
| scripture_transcript_878444 | 509 | + | 3.47 | 15.26 | 7.63 | 15.63 | -1.085 |
| scripture_transcript_917095 | 421 | - | 3.00 | 12.65 | 7.61 | 16.01 | -1.327 |
| scripture_transcript_927241 | 294 | - | 1.60 | 96.00 | 209.63 | 1128.14 | -1.053 |
| scripture_transcript_927242 | 693 | - | 5.06 | 83.71 | 201.18 | 1064.65 | -0.879 |
| scripture_transcript_927243 | 187 | - | 0.88 | 95.18 | 243.39 | 1055.63 | -1.021 |
| scripture_transcript_927244 | 586 | - | 5.47 | 81.20 | 210.41 | 1029.92 | -0.830 |
| scripture_transcript_927245 | 188 | - | 1.63 | 94.67 | 239.54 | 1053.66 | -1.035 |
| scripture_transcript_927246 | 587 | - | 5.70 | 81.06 | 209.24 | 1029.33 | -0.830 |
| scripture_transcript_1325038 | 2384 | + | 0.50 | 59.10 | 2.99 | 1.38 | -1.345 |
| scripture_transcript_1325062 | 2254 | + | 0.50 | 60.23 | 3.17 | 1.46 | -1.206 |
| scripture_transcript_1325066 | 2155 | + | 0.50 | 60.13 | 3.31 | 1.53 | -1.352 |
| scripture_transcript_1325070 | 2260 | + | 0.50 | 49.10 | 3.95 | 1.67 | -1.327 |
| scripture_transcript_1328028 | 2661 | - | 0.50 | 46.21 | 17.70 | 6.97 | -0.173 |
| scripture_transcript_1350529 | 3110 | - | 1.09 | 56.31 | 27.18 | 5.84 | 1.518 |
| scripture_transcript_1350532 | 2539 | - | 1.72 | 92.38 | 32.98 | 12.57 | 1.042 |
| scripture_transcript_1350544 | 847 | - | 2.62 | 135.76 | 28.17 | 18.17 | -0.537 |
| scripture_transcript_1350546 | 1293 | - | 2.60 | 104.59 | 18.24 | 14.20 | -0.404 |
| scripture_transcript_1350556 | 1206 | - | 2.79 | 105.81 | 17.67 | 12.77 | -0.385 |
| scripture_transcript_1350566 | 625 | - | 3.35 | 94.78 | 11.12 | 8.41 | -0.634 |
| scripture_transcript_1350567 | 623 | - | 3.34 | 94.51 | 11.09 | 8.36 | -0.616 |
| scripture_transcript_1409984 | 684 | + | 1.80 | 9.03 | 14.16 | 8.23 | -1.162 |
| scripture_transcript_1445471 | 421 | + | 9.01 | 18.88 | 31.00 | 28.23 | -0.723 |
| scripture_transcript_1447029 | 754 | - | 0.50 | 97.16 | 24.26 | 11.23 | -1.149 |
| scripture_transcript_1502877 | 244 | + | 3.78 | 8.32 | 44.84 | 26.21 | 0.068 |
| scripture_transcript_1603398 | 156 | - | 11.68 | 32.68 | 39.65 | 26.67 | -0.147 |
| scripture_transcript_1603400 | 104 | + | 2.95 | 12.03 | 6.18 | 35.96 | -1.209 |
| scripture_transcript_1721632 | 3480 | - | 36.39 | 137.80 | 852.61 | 170.05 | 0.526 |
| scripture_transcript_1870348 | 2579 | + | 1.31 | 122.52 | 5.97 | 11.35 | 0.476 |
| scripture_transcript_1963116 | 83 | - | 1.78 | 3.68 | 8.48 | 53.81 | -1.124 |
| scripture_transcript_1997210 | 1682 | - | 3.02 | 30.57 | 10.52 | 32.10 | -1.002 |
| scripture_transcript_2171244 | 1180 | + | 4.25 | 11.35 | 19.53 | 25.47 | -1.337 |
| scripture_transcript_4400 | 2031 | + | 39.57 | 18.78 | 3.50 | 17.51 | -0.726 |
| scripture_transcript_191919 | 330 | - | 941.82 | 349.09 | 56.25 | 5.39 | -1.099 |
| scripture_transcript_191920 | 954 | + | 345.60 | 128.19 | 26.86 | 3.22 | 1.038 |
| scripture_transcript_267192 | 1855 | - | 76.91 | 33.37 | 23.95 | 11.51 | -1.072 |
| scripture_transcript_267216 | 2624 | - | 59.57 | 28.42 | 18.97 | 9.39 | 0.369 |
| scripture_transcript_267240 | 1501 | - | 92.22 | 40.67 | 29.74 | 14.23 | -1.053 |
| scripture_transcript_267248 | 2515 | - | 55.70 | 27.55 | 18.88 | 11.36 | -0.905 |
| scripture_transcript_267264 | 1544 | - | 88.45 | 38.87 | 28.34 | 11.92 | -0.956 |
| scripture_transcript_567977 | 606 | + | 40.93 | 15.48 | 15.37 | 17.98 | -0.722 |
| scripture_transcript_1079963 | 833 | + | 65.21 | 30.94 | 0.54 | 12.64 | -0.673 |
| scripture_transcript_1079965 | 471 | + | 73.32 | 28.54 | 0.95 | 18.79 | -1.286 |
| scripture_transcript_1241444 | 1062 | + | 64.70 | 25.48 | 0.50 | 0.50 | -1.056 |
| scripture_transcript_1399196 | 1853 | + | 72.61 | 28.09 | 0.50 | 0.50 | 0.428 |
| scripture_transcript_1399197 | 1869 | + | 72.37 | 27.73 | 0.50 | 0.50 | 0.426 |
| scripture_transcript_1499345 | 218 | + | 35.73 | 16.46 | 0.50 | 0.64 | -1.282 |
| scripture_transcript_1499346 | 216 | + | 35.74 | 16.48 | 0.50 | 0.64 | -1.280 |
| scripture_transcript_1499347 | 1090 | - | 37.78 | 18.55 | 0.50 | 1.44 | -1.070 |
| scripture_transcript_1499349 | 1054 | - | 38.87 | 19.18 | 0.50 | 1.49 | -1.065 |
| scripture_transcript_1499351 | 931 | - | 37.29 | 18.63 | 0.50 | 1.69 | -1.046 |
| scripture_transcript_1544409 | 1115 | - | 78.70 | 31.99 | 14.59 | 7.33 | -1.041 |
| scripture_transcript_1544414 | 476 | - | 127.14 | 55.20 | 22.65 | 8.39 | -0.871 |
| scripture_transcript_1907797 | 1420 | + | 46.64 | 12.39 | 14.09 | 10.69 | -0.952 |
| scripture_transcript_1907813 | 997 | + | 31.98 | 9.13 | 13.47 | 10.68 | -0.865 |
| scripture_transcript_1907820 | 1052 | + | 30.80 | 12.44 | 13.21 | 2.17 | -1.050 |
| scripture_transcript_2050373 | 383 | + | 39.44 | 12.28 | 1.76 | 0.50 | -0.130 |
| scripture_transcript_2050374 | 453 | + | 42.69 | 13.32 | 1.98 | 0.50 | -0.200 |
| scripture_transcript_2050375 | 441 | + | 34.06 | 11.75 | 2.04 | 0.50 | -1.021 |
| scripture_transcript_2181160 | 381 | + | 14.07 | 1.12 | 0.50 | 0.50 | -0.988 |
