# Supplementary material for: BRAFV600E remodels the melanocyte transcriptome and induces BANCR to regulate melanoma cell migration
Source: HighWire-hosted journal article supplement (doi:10.1101/gr.140061.112), 2012-05-11
Supplement: Flockhart_supplementary_table_4.docx [file Flockhart_supplementary_table_4.docx]

**Supplementary table 4**

| **VALIDATION OF EXPRESSION REGULATION BY BRAF OVER-EXPRESSION** | | | |
| --- | --- | --- | --- |
|  |  | **qPCR validation** | |
|  |  | **(fold change)** | |
| **Gene ID** | **Expression in RNAseq** | **mean** | ***sd*** |
| ENST00000437232 | induced | 10.4 | *1.69* |
| ENST00000434063 | induced | 5.7 | *2.06* |
| NR_001458 | induced | 6.4 | *2.52* |
| ENST00000484550 | induced | 2.6 | *0.59* |
| ENST00000439703 | induced | 5.8 | *1.95* |
| ENST00000441644 | induced | 5.9 | *3.25* |
| ENST00000456896 | induced | 13.4 | *4.99* |
| ENST00000473756 | induced | 12.5 | *5.94* |
| ENST00000443593 | induced | 2.9 | *0.37* |
| NR_026656 | repressed | 0.5 | *0.03* |
| NR_026765 | repressed | 0.2 | *0.16* |
| NR_023938 | repressed | 0.4 | *0.18* |
