# Supplementary material for: BRAFV600E remodels the melanocyte transcriptome and induces BANCR to regulate melanoma cell migration
Source: HighWire-hosted journal article supplement (doi:10.1101/gr.140061.112), 2012-05-11
Supplement: Flockhart_supplementary_table_5.docx [file Flockhart_supplementary_table_5.docx]

**Supplementary table 5**

| **VALIDATION OF EXPRESSION REGULATION BY BRAF OVER-EXPRESSION** | | | | | **qPCR validation** | |
| --- | --- | --- | --- | --- | --- | --- |
|  |  |  |  |  | **(fold change)** | |
| **Sripture ID** | **size** | **strand** | **CPC score** | **Expression in RNAseq** | **mean** | **sd** |
| scripture_transcript_927242 | 693 | - | -0.879 | induced | 4.45 | 1.38 |
| scripture_transcript_1350532 | 2539 | - | 1.042 | induced | 15.24 | 3.41 |
| scripture_transcript_191919 | 330 | - | -1.099 | repressed | 0.16 | 0.11 |
| scripture_transcript_1907797 | 1420 | + | -0.952 | repressed | 0.15 | 0.09 |
| scripture_transcript_2050374 | 453 | + | -0.200 | repressed | 0.33 | 0.07 |
| scripture_transcript_878437 | 2302 | - | 5.084 | induced | 4.56 | 0.31 |
| scripture_transcript_1328028 | 2661 | - | -0.173 | induced | 11.04 | 3.78 |
| scripture_transcript_1445471 | 421 | + | -0.723 | induced | 3.62 | 1.42 |
| scripture_transcript_267192 | 1855 | - | -1.072 | repressed | 0.33 | 0.21 |
| scripture_transcript_1079963 | 833 | + | -0.673 | repressed | 0.22 | 0.16 |
| scripture_transcript_1241444 | 1062 | + | -1.056 | repressed | 0.25 | 0.08 |
| scripture_transcript_2050373 | 383 | + | -0.130 | repressed | 0.38 | 0.10 |
| scripture_transcript_2050375 | 441 | + | -1.021 | repressed | 0.39 | 0.10 |
