# Supplementary material for: BRAFV600E remodels the melanocyte transcriptome and induces BANCR to regulate melanoma cell migration
Source: HighWire-hosted journal article supplement (doi:10.1101/gr.140061.112), 2012-05-11
Supplement: Flockhart_supplementary_table_6.docx [file Flockhart_supplementary_table_6.docx]

**Supplementary table 6**

|  | **ENCODE cell type & expression value (FPKM)** | | | | | | | | | |
| --- | --- | --- | --- | --- | --- | --- | --- | --- | --- | --- |
| **NAME** | **H1ESC** | **K562** | **HSMM** | **NHLF** | **HUVEC** | **GM12878** | **HELA** | **HEPG2** | **MCF7** | **NHEK** |
| NR_026656 | 0.00 | 1.34 | 47.71 | 60.62 | 23.40 | 3.28 | 2.78 | 0.00 | 59.99 | 33.72 |
| scripture_transcript_658767 | 2.24 | 77.90 | 8.77 | 5.66 | 1.69 | 7.98 | 20.19 | 18.85 | 4.49 | 40.51 |
| NR_023938 | 85.96 | 0.00 | 57.72 | 110.32 | 1.72 | 2.71 | 0.00 | 0.00 | 1.66 | 3.68 |
| NR_036263 | 846.80 | 2999.79 | 278.89 | 448.76 | 2391.30 | 4481.82 | 1353.66 | 805.25 | 608.43 | 601.53 |
| ENST00000484550 | 1.44 | 0.00 | 0.89 | 2.08 | 0.51 | 0.00 | 0.00 | 0.00 | 1.64 | 1.50 |
| NR_033464 | 0.00 | 0.01 | 0.05 | 6.93 | 0.06 | 0.00 | 7.84 | 4.05 | 6.99 | 1.05 |
| ENST00000428939 | 0.00 | 0.00 | 6.31 | 3.13 | 6.49 | 0.01 | 9.52 | 0.00 | 21.84 | 111.61 |
| scripture_transcript_1870348 | 0.53 | 3.42 | 0.04 | 0.01 | 0.18 | 0.40 | 3.40 | 0.90 | 0.13 | 0.36 |
| ENST00000437232 | 5.83 | 66.69 | 5.26 | 4.65 | 3.93 | 12.17 | 8.45 | 0.00 | 12.84 | 3.95 |
| ENST00000456409 | 0.35 | 0.42 | 0.00 | 0.40 | 0.53 | 6.32 | 0.10 | 0.87 | 0.00 | 11.76 |
| NR_036638 | 76.48 | 68.33 | 47.21 | 68.64 | 36.31 | 0.27 | 1.44 | 0.02 | 29.39 | 1.47 |
| ENST00000445531 | 0.00 | 0.00 | 34.92 | 499.23 | 0.00 | 0.00 | 16.43 | 0.00 | 97.89 | 0.00 |
| ENST00000451054 | 0.38 | 16.68 | 0.00 | 7.87 | 0.00 | 75.92 | 50.57 | 44.34 | 0.00 | 9.28 |
| scripture_transcript_878442 | 0.73 | 0.16 | 0.48 | 0.10 | 0.51 | 0.80 | 0.06 | 0.26 | 0.72 | 0.81 |
| scripture_transcript_878437 | 1.44 | 0.10 | 0.34 | 0.10 | 0.33 | 0.54 | 0.06 | 0.17 | 0.40 | 0.56 |
| scripture_transcript_878438 | 0.27 | 0.04 | 0.00 | 0.15 | 0.10 | 0.33 | 0.37 | 0.24 | 0.32 | 0.33 |
| NR_036515 | 3.83 | 38.64 | 11.04 | 39.98 | 25.30 | 43.02 | 146.48 | 2.61 | 24.64 | 139.19 |
| NR_034181 | 4.23 | 0.00 | 0.25 | 0.00 | 0.00 | 21.32 | 0.00 | 15.46 | 0.27 | 0.00 |
| NR_036579 | 3.85 | 15.83 | 0.00 | 50.23 | 0.00 | 6.65 | 1.23 | 11.32 | 59.84 | 71.74 |
| ENST00000481846 | 21.29 | 20.65 | 6.41 | 11.97 | 2.11 | 0.42 | 5.55 | 0.70 | 23.41 | 4.50 |
| ENST00000440079 | 10.89 | 28.77 | 6.56 | 26.85 | 14.35 | 0.00 | 17.65 | 52.92 | 18.67 | 0.09 |
| scripture_transcript_458834 | 0.83 | 0.56 | 1.89 | 0.66 | 1.02 | 1.03 | 1.11 | 1.40 | 1.56 | 1.50 |
| ENST00000416463 | 0.00 | 0.00 | 110.16 | 66.98 | 0.00 | 0.00 | 167.87 | 220.01 | 0.00 | 0.00 |
| scripture_transcript_4400 | 0.70 | 0.78 | 0.29 | 0.11 | 0.02 | 0.24 | 0.00 | 0.45 | 0.31 | 0.18 |
| scripture_transcript_1721632 | 0.04 | 0.09 | 0.20 | 0.22 | 4.04 | 0.24 | 0.44 | 0.04 | 0.00 | 0.04 |
| ENST00000416193 | 23.57 | 12.36 | 0.01 | 2.65 | 0.46 | 2.10 | 16.98 | 12.79 | 5.04 | 3.19 |
| ENST00000457747 | 0.01 | 3.20 | 0.02 | 4.39 | 0.00 | 0.00 | 0.07 | 0.01 | 0.00 | 0.35 |
| scripture_transcript_2171244 | 1.18 | 0.95 | 0.74 | 0.75 | 0.72 | 0.13 | 2.09 | 0.22 | 0.52 | 0.63 |
| NR_037658 | 5.58 | 5.71 | 0.80 | 15.95 | 0.63 | 0.01 | 12.33 | 0.21 | 0.00 | 0.35 |
| ENST00000454635 | 0.00 | 11.77 | 0.07 | 4.83 | 4.36 | 0.00 | 99.50 | 7.75 | 0.19 | 0.76 |
| ENST00000434063 | 0.00 | 0.00 | 2.56 | 1.08 | 14.10 | 0.04 | 15.34 | 0.00 | 24.22 | 104.20 |
| scripture_transcript_1445471 | 7.82 | 0.62 | 0.14 | 0.07 | 0.00 | 2.66 | 1.49 | 4.17 | 36.77 | 13.90 |
| ENST00000418215 | 0.00 | 16.07 | 0.00 | 0.00 | 5.25 | 15.97 | 4.61 | 0.00 | 0.00 | 9.72 |
| scripture_transcript_559853 | 5.31 | 11.40 | 2.64 | 3.16 | 1.27 | 1.32 | 1.66 | 2.73 | 2.37 | 1.15 |
| ENST00000443593 | 12.18 | 0.00 | 2.08 | 0.00 | 0.00 | 0.00 | 0.00 | 0.00 | 0.00 | 0.00 |
| NR_036442 | 11.79 | 0.00 | 57.76 | 0.00 | 5.32 | 0.00 | 0.00 | 2.87 | 0.00 | 3.30 |
| scripture_transcript_559854 | 19.15 | 3.18 | 7.09 | 1.96 | 1.19 | 1.85 | 1.65 | 2.72 | 3.06 | 1.13 |
| ENST00000436013 | 5.52 | 0.00 | 0.00 | 0.00 | 0.00 | 0.00 | 0.00 | 0.00 | 0.00 | 0.00 |
| scripture_transcript_567977 | 0.62 | 0.06 | 0.00 | 0.27 | 0.00 | 0.00 | 0.37 | 0.16 | 0.27 | 0.46 |
| scripture_transcript_927245 | 1.55 | 4.02 | 0.00 | 0.00 | 0.00 | 0.00 | 0.00 | 0.00 | 0.00 | 0.00 |
| ENST00000412606 | 0.00 | 24.38 | 0.00 | 0.00 | 0.00 | 9.47 | 0.00 | 0.00 | 0.00 | 0.00 |
| scripture_transcript_927246 | 0.13 | 1.21 | 0.00 | 0.04 | 0.00 | 0.00 | 0.00 | 0.00 | 0.00 | 0.00 |
| ENST00000441644 | 0.00 | 9.05 | 0.00 | 0.00 | 0.00 | 0.00 | 0.00 | 0.00 | 0.00 | 0.00 |
| scripture_transcript_596358 | 0.00 | 0.76 | 0.18 | 0.00 | 0.06 | 0.00 | 34.91 | 0.24 | 0.00 | 0.10 |
| scripture_transcript_793541 | 0.58 | 0.71 | 0.00 | 0.00 | 0.00 | 0.36 | 4.15 | 14.75 | 0.17 | 0.00 |
| scripture_transcript_927241 | 0.03 | 0.73 | 0.00 | 0.00 | 0.00 | 0.03 | 0.00 | 0.00 | 0.03 | 0.00 |
| scripture_transcript_927243 | 1.55 | 4.93 | 0.00 | 0.00 | 0.00 | 0.00 | 0.00 | 0.00 | 0.00 | 0.00 |
| scripture_transcript_927244 | 0.13 | 0.52 | 0.00 | 0.04 | 0.00 | 0.00 | 0.00 | 0.00 | 0.00 | 0.00 |
| scripture_transcript_1997210 | 0.00 | 0.10 | 0.04 | 0.02 | 0.01 | 0.03 | 0.05 | 0.03 | 0.93 | 0.10 |
| scripture_transcript_1399196 | 0.00 | 0.11 | 0.00 | 0.00 | 0.00 | 0.01 | 0.00 | 0.00 | 0.00 | 0.00 |
| scripture_transcript_267216 | 0.00 | 0.04 | 0.00 | 0.00 | 0.00 | 0.00 | 0.00 | 0.00 | 0.00 | 0.00 |
| scripture_transcript_1399197 | 0.00 | 0.11 | 0.00 | 0.00 | 0.00 | 0.01 | 0.00 | 0.00 | 0.00 | 0.00 |
| scripture_transcript_927242 | 0.01 | 0.55 | 0.00 | 0.01 | 0.00 | 0.04 | 0.00 | 0.00 | 0.03 | 0.00 |
| ENST00000439703 | 0.00 | 0.00 | 105.14 | 19.43 | 0.00 | 0.00 | 0.00 | 0.00 | 4.38 | 0.00 |
| scripture_transcript_1409984 | 0.00 | 0.00 | 3.25 | 2.06 | 0.29 | 0.00 | 0.00 | 0.00 | 0.08 | 0.00 |
| ENST00000473756 | 0.00 | 0.00 | 20.01 | 5.86 | 0.00 | 0.00 | 0.00 | 0.00 | 37.76 | 0.00 |
| scripture_transcript_1447029 | 0.00 | 0.20 | 0.79 | 0.59 | 0.36 | 0.00 | 0.17 | 1.37 | 0.27 | 0.07 |
| NR_001458 | 0.00 | 0.00 | 2.50 | 11.39 | 17.00 | 1902.47 | 0.00 | 0.00 | 0.00 | 0.00 |
| NR_033979 | 0.00 | 0.00 | 0.00 | 0.00 | 57.13 | 0.00 | 0.00 | 75.64 | 0.00 | 0.00 |
| scripture_transcript_1328028 | 0.00 | 0.00 | 0.00 | 0.00 | 0.15 | 0.00 | 0.00 | 0.00 | 0.01 | 0.00 |
| ENST00000440578 | 0.00 | 0.00 | 0.00 | 0.00 | 0.00 | 5.63 | 0.00 | 0.00 | 0.00 | 207.70 |
| NR_026765 | 0.00 | 0.00 | 0.00 | 0.00 | 0.00 | 0.00 | 3.33 | 0.00 | 1.72 | 0.00 |
| scripture_transcript_191919 | 0.00 | 0.00 | 0.00 | 0.00 | 0.00 | 0.00 | 0.00 | 0.00 | 0.00 | 0.00 |
| scripture_transcript_191920 | 0.00 | 0.00 | 0.00 | 0.00 | 0.00 | 0.00 | 0.00 | 0.00 | 0.00 | 0.00 |
| ENST00000380106 | 0.00 | 0.00 | 0.00 | 0.00 | 0.00 | 0.00 | 0.00 | 0.00 | 0.00 | 0.00 |
| scripture_transcript_1544414 | 0.00 | 0.00 | 0.05 | 0.00 | 0.00 | 0.16 | 0.00 | 0.00 | 0.00 | 0.00 |
| scripture_transcript_267240 | 0.00 | 0.04 | 0.00 | 0.00 | 0.00 | 0.00 | 0.00 | 0.00 | 0.00 | 0.00 |
| scripture_transcript_267264 | 0.00 | 0.04 | 0.00 | 0.00 | 0.00 | 0.00 | 0.00 | 0.00 | 0.00 | 0.00 |
| scripture_transcript_1544409 | 0.00 | 0.00 | 0.03 | 0.00 | 0.00 | 0.06 | 0.00 | 0.00 | 0.00 | 0.00 |
| scripture_transcript_267192 | 0.00 | 0.03 | 0.00 | 0.00 | 0.00 | 0.02 | 0.00 | 0.00 | 0.00 | 0.00 |
| scripture_transcript_1079965 | 0.12 | 0.00 | 0.00 | 0.00 | 0.00 | 0.00 | 0.00 | 0.03 | 0.00 | 0.00 |
| scripture_transcript_1079963 | 0.29 | 0.00 | 0.00 | 0.00 | 0.00 | 0.00 | 0.00 | 0.03 | 0.00 | 0.00 |
| scripture_transcript_1241444 | 0.00 | 0.00 | 0.00 | 0.03 | 0.00 | 0.00 | 0.00 | 0.00 | 0.00 | 0.00 |
| scripture_transcript_267248 | 0.00 | 0.00 | 0.00 | 0.00 | 0.00 | 0.00 | 0.00 | 0.00 | 0.00 | 0.02 |
| scripture_transcript_1907797 | 0.00 | 0.00 | 0.00 | 0.00 | 0.00 | 0.00 | 0.00 | 0.00 | 0.00 | 0.00 |
| scripture_transcript_2050374 | 0.00 | 0.00 | 0.00 | 0.00 | 0.00 | 0.00 | 0.00 | 0.00 | 0.00 | 0.00 |
| scripture_transcript_2050373 | 0.00 | 0.00 | 0.00 | 0.00 | 0.00 | 0.00 | 0.00 | 0.00 | 0.00 | 0.00 |
| scripture_transcript_1499349 | 0.00 | 0.00 | 0.00 | 0.00 | 0.00 | 0.00 | 0.00 | 0.00 | 0.00 | 0.00 |
| scripture_transcript_1499347 | 0.00 | 0.00 | 0.00 | 0.00 | 0.00 | 0.00 | 0.00 | 0.00 | 0.00 | 0.00 |
| scripture_transcript_1499351 | 0.00 | 0.00 | 0.00 | 0.00 | 0.00 | 0.00 | 0.00 | 0.00 | 0.00 | 0.00 |
| scripture_transcript_1499346 | 0.00 | 0.00 | 0.00 | 0.00 | 0.00 | 0.00 | 0.00 | 0.00 | 0.00 | 0.00 |
| scripture_transcript_1499345 | 0.00 | 0.00 | 0.00 | 0.00 | 0.00 | 0.00 | 0.00 | 0.00 | 0.00 | 0.00 |
| scripture_transcript_2050375 | 0.00 | 0.00 | 0.00 | 0.00 | 0.00 | 0.00 | 0.00 | 0.00 | 0.00 | 0.00 |
| scripture_transcript_1907813 | 0.00 | 0.00 | 0.00 | 0.00 | 0.00 | 0.00 | 0.00 | 0.00 | 0.00 | 0.00 |
| scripture_transcript_1907820 | 0.00 | 0.00 | 0.00 | 0.00 | 0.00 | 0.00 | 0.00 | 0.00 | 0.00 | 0.00 |
| scripture_transcript_2181160 | 0.00 | 0.00 | 0.00 | 0.00 | 0.00 | 0.00 | 0.00 | 0.00 | 0.00 | 0.00 |
| ENST00000437430 | 0.00 | 0.00 | 0.00 | 0.00 | 0.00 | 0.00 | 0.00 | 0.00 | 0.00 | 0.00 |
| ENST00000469937 | 0.00 | 0.00 | 0.00 | 0.00 | 0.00 | 0.00 | 0.00 | 0.00 | 0.00 | 0.00 |
| scripture_transcript_509112 | 0.00 | 0.00 | 0.00 | 0.00 | 0.00 | 0.07 | 0.00 | 0.00 | 0.00 | 0.00 |
| scripture_transcript_1603398 | 0.00 | 0.00 | 0.00 | 0.00 | 0.00 | 0.00 | 0.00 | 0.00 | 1.13 | 0.00 |
| scripture_transcript_1502877 | 0.38 | 0.23 | 0.00 | 0.00 | 0.60 | 0.73 | 0.48 | 0.31 | 0.00 | 0.81 |
| scripture_transcript_878444 | 0.64 | 0.00 | 0.00 | 0.06 | 0.40 | 0.00 | 0.34 | 0.16 | 0.34 | 0.53 |
| scripture_transcript_1350566 | 0.00 | 0.00 | 0.00 | 0.00 | 0.00 | 0.17 | 0.00 | 0.00 | 0.00 | 0.00 |
| scripture_transcript_1350567 | 0.00 | 0.00 | 0.00 | 0.00 | 0.00 | 0.17 | 0.00 | 0.00 | 0.00 | 0.00 |
| scripture_transcript_917095 | 0.00 | 0.00 | 0.00 | 0.00 | 0.00 | 0.00 | 0.00 | 0.00 | 0.07 | 0.00 |
| scripture_transcript_1603400 | 0.00 | 0.00 | 0.00 | 0.00 | 0.00 | 0.00 | 0.00 | 0.00 | 0.00 | 0.00 |
| scripture_transcript_1350556 | 0.00 | 0.00 | 0.00 | 0.00 | 0.00 | 0.00 | 0.00 | 0.00 | 0.00 | 0.00 |
| scripture_transcript_1350544 | 0.00 | 0.00 | 0.00 | 0.00 | 0.00 | 0.00 | 0.00 | 0.00 | 0.00 | 0.00 |
| scripture_transcript_1350546 | 0.00 | 0.00 | 0.00 | 0.00 | 0.00 | 0.00 | 0.00 | 0.00 | 0.00 | 0.00 |
| scripture_transcript_1963116 | 0.00 | 0.00 | 0.00 | 0.00 | 0.00 | 0.00 | 0.00 | 0.00 | 0.00 | 0.00 |
| scripture_transcript_1350532 | 0.00 | 0.00 | 0.00 | 0.02 | 0.00 | 0.01 | 0.00 | 0.03 | 0.01 | 0.00 |
| scripture_transcript_543843 | 0.00 | 0.06 | 0.00 | 0.00 | 0.00 | 0.00 | 0.00 | 0.00 | 0.00 | 0.00 |
| scripture_transcript_1350529 | 0.00 | 0.00 | 0.00 | 0.02 | 0.00 | 0.01 | 0.00 | 0.03 | 0.01 | 0.00 |
| ENST00000456896 | 0.00 | 0.00 | 0.00 | 0.00 | 0.00 | 0.00 | 0.00 | 0.00 | 0.00 | 0.00 |
| scripture_transcript_1325038 | 0.00 | 0.00 | 0.03 | 0.00 | 0.00 | 0.00 | 0.00 | 0.00 | 0.00 | 0.00 |
| scripture_transcript_1325062 | 0.00 | 0.00 | 0.03 | 0.00 | 0.00 | 0.01 | 0.00 | 0.00 | 0.00 | 0.00 |
| scripture_transcript_1325066 | 0.00 | 0.00 | 0.01 | 0.00 | 0.00 | 0.01 | 0.00 | 0.00 | 0.00 | 0.00 |
| scripture_transcript_1325070 | 0.00 | 0.00 | 0.00 | 0.00 | 0.00 | 0.01 | 0.00 | 0.00 | 0.00 | 0.00 |
| ENST00000441790 | 0.00 | 0.00 | 0.00 | 0.00 | 0.00 | 0.00 | 0.00 | 0.00 | 0.00 | 0.00 |
