# Supplementary material for: BRAFV600E remodels the melanocyte transcriptome and induces BANCR to regulate melanoma cell migration
Source: HighWire-hosted journal article supplement (doi:10.1101/gr.140061.112), 2012-05-11
Supplement: Flockhart_supplementary_table_7.docx [file Flockhart_supplementary_table_7.docx]

**Supplementary table 7** – ENCODE transcription factor binding (zoom to read this)
