# Supplementary material for: BRAFV600E remodels the melanocyte transcriptome and induces BANCR to regulate melanoma cell migration
Source: HighWire-hosted journal article supplement (doi:10.1101/gr.140061.112), 2012-05-11
Supplement: Flockhart_supplementary_table_9.docx [file Flockhart_supplementary_table_9.docx]

**Supplementary table 9**

| **Our RNAseq data** |  |  |
| --- | --- | --- |
| **Sample** | **Total reads** | **Mapped reads** |
| MC + RFP control | 138,000,000 | 132,328,821 |
| MC + BRAF | 200,096,444 | 189,710,038 |
| Melanoma #1 | 125,769,910 | 90,578,173 |
| Melanoma #2 | 143,821,224 | 117,197,361 |
| *Average* | *151,921,895* | *132,453,598* |
