# Supplementary material for: BRAFV600E remodels the melanocyte transcriptome and induces BANCR to regulate melanoma cell migration
Source: HighWire-hosted journal article supplement (doi:10.1101/gr.140061.112), 2012-05-11
Supplement: Flockhart_supplementary_table_10.docx [file Flockhart_supplementary_table_10.docx]

**Supplementary table 10**

| **Berger et al. RNA seq data remapped** |  |
| --- | --- |
| **Sample** | **Mapped reads** |
| M980928 | 21,170,766 |
| M990514 | 21,347,894 |
| M000216 | 20,976,579 |
| M990802 | 21,611,978 |
| M980409 | 21,963,983 |
| M970109 | 21,178,493 |
| M010403 | 12,920,770 |
| *Average* | *20,167,209* |
