# Supplementary material for: BRAFV600E remodels the melanocyte transcriptome and induces BANCR to regulate melanoma cell migration
Source: HighWire-hosted journal article supplement (doi:10.1101/gr.140061.112), 2012-05-11
Supplement: suppmethodsfiglegends.docx [file suppmethodsfiglegends.docx]

**Supplementary methods**

**Cell viability assay**

Cell viability following BANCR knockdown was determined using the CellTiter-Blue Cell Viability Assay kit (Promega). After shRNA lenti-infection and puromycin selection, cells were seeded at 5000 cells/well in 24-well plates in triplicate. Assay measurements were performed 1, 4 and 7 days after seeding as per manufacturer’s instructions.

**Supplementary Figure Legends**

**Supplementary Fig. 1.** **(A)** Over-expression of BRAFV600E in primary human melanocytes. MAPK pathway activation indicated by increased pERK signal. **(B)** Example of Sanger sequencing result from primary melanoma samples identifying *BRAFV600E* mutation (T>A at base position 1799 in BRAF). **(C)** Table showing AJCC staging, *BRAF/NRAS* mutational status and % melanocyte mass of primary melanoma samples used in our study. **(D)** H&E histological staining of primary melanoma samples used in our study.

**Supplementary Fig. 2. (A)** Heatmap showing presence of transcription factor binding sites (ENCODE data) in BRAF-regulated transcripts. Red = positive binding, white = no binding detected.

**Supplementary Fig. 3. (A)** *NR_026656* – Typical example of a BRAF-regulated annotated lncRNA, expressed in other tissues. ‘Control’ and ‘BRAFV600E’ are RNA-seq data from our study. ENCODE data from NHEKs (normal human epidermal keratinocytes) showing RNA-seq data, ChIP-seq data for H3K4me3, H3K36me3, RNA pol II and DNaseH data. DNaseH data from primary melanocytes (ENCODE, MC) and transcription factor binding (ENCODE) is also shown. **(B)** Expression of NR_026656 in our samples analyzed by RNA-seq. Values shown in FPKM. **(C)** qRT-PCR validation of NR_026656 expression in primary melanoma samples. **(D)** qRT-PCR validation of regulation of NR_026656 expression by oncogenic BRAF and NRas. **(E)** NR_026656 expression in other cell types (ENCODE RNA-seq data).

**Supplementary Fig. 4. (A)** Ranked profile showing expression of the 70 novel transcripts identified in our study. Values are mean fold change across all 3 samples (melanocytes + BRAFV600E, melanoma #1 and melanoma #2) analyzed by RNA-seq. BANCR is one of the most highly up-regulated novel transcripts. **(B)** Representative RNA-seq track from Berger *et al*. data (Berger et al. 2010) showing that RNA-seq peaks match with our Scripture and Trinity-derived BANCR transcript architecture. Control sample is pooled normal melanocytes. Y-axis is number of RNA-seq reads normalized for mapping. **(C)** Expression of BANCR in primary melanoma samples from Berger *et al*. data calculated using Cuffdiff.

**Supplementary Fig. 5. (A)** BANCR is expressed in K562 leukemia cells. ‘BRAF’ is our RNA-seq data and is shown for reference. ENCODE data for K562 cells is shown as follows: RNA-seq data, ChIP-seq data for H3K4me3, H3K36me3, RNA pol II, DNaseH-seq data, H3K4me1 and H3K27Ac ChIP-seq. DNaseH data from primary melanocytes (ENCODE, MC) and transcription factor binding (ENCODE) is also shown. **(B)** BANCR is also expressed in H1ES cells. ENCODE data for H1ES cells is shown as follows: RNA-seq data, ChIP-seq data for H3K4me3, H3K36me3, RNA pol II, DNaseH-seq data and H3K4me1 ChIP-seq.

**Supplementary Fig. 6. (A)** Melanoma cell viability in vitro after BANCR knockdown over one week in culture. **(B)** Knockdown efficiency of BANCR in CXCL11 experiment and expression of CXCL11 in BANCR knockdown cells. **(C)** Analysis of sk-mel-5 melanoma cell migration in the presence of CXCL11. Cells infected with scrambled control shRNA were treated with vehicle (PBS), 10ng/ml or 100ng/ml CXCL11. CXCL11 does not affect baseline cell migration. **(D)** Representative images of experiment quantified in (C).
