# Supplementary material for: BRAFV600E remodels the melanocyte transcriptome and induces BANCR to regulate melanoma cell migration
Source: HighWire-hosted journal article supplement (doi:10.1101/gr.140061.112), 2012-05-11
Supplement: suppmethodstab1.docx [file suppmethodstab1.docx]

**Supplementary methods table 1**

| **qPCR primers for novel transcripts** |  |  |  |
| --- | --- | --- | --- |
| ***Sripture ID*** | ***Forward*** | ***Reverse*** |  |
| scripture_transcript_927242 | TTCCTTAGGGTCAGGGGTCT | GATTGGGACCCTTTTCTGGT | (BANCR) |
| scripture_transcript_1350532 | AGCCACCTTGTAGAGCTGGA | ACTGGGATTACAGGCGTGAG |  |
| scripture_transcript_191919 | TGGATGAGACCCCTTTTCTG | TTGGAGGGTCTCACCTCATT |  |
| scripture_transcript_1907797 | AAAGAGCACGGAGGTGAGAA | CGTCACCCTGGCTTAACAGT |  |
| scripture_transcript_2050374 | CACTCTCTCTCCCAGGCTGT | AGGCTGAGGCAGAAGAATCA |  |
| scripture_transcript_878437 | CCCTTTTCTCCACAACCTCA | TGCAAATCAAAACCACAATGA |  |
| scripture_transcript_1328028 | AAGGGATTCCATGTGACGAG | GCCTGGGATGAGTCAAGGTA |  |
| scripture_transcript_1445471 | TGAAGCCTTTTAGGCCCATT | GCTGTGGTGCAGTCCTCATA |  |
| scripture_transcript_267192 | AGATGAAGTAGGCCTGGTGGT | ACGAGGGAAACAGTGCAAAG |  |
| scripture_transcript_1079963 | GACGTTGGCACTAGGACGTT | GACCTTCTTCTGGAGCCTCA |  |
| scripture_transcript_1241444 | CACGTCAACGTCAACAGGAC | AGCATGTAGGATGGGGACAC |  |
| scripture_transcript_2050373 | GGCTGTAGTGCAGTGGTGTG | CACCTGTGGTTCCGCTACTT |  |
| scripture_transcript_2050375 | CTGATGCGTCCCCAGAAG | AGGTTTAATTGGCTCATGGTTC |  |
|  |  |  |  |
| **qPCR primers for annotated ncRNAs** |  |  |  |
| ***Refseq/Gencode ID*** | ***Forward*** | ***Reverse*** |  |
| ENST00000437232 | AAGAAGCCTTCGATGTGAGG | ACTAGTACACCCCCGACGTG |  |
| ENST00000434063 | GGCCCAAATCTTAGACTGTCC | TTCAGTGCACAGGTTCAAGC |  |
| NR_001458 | GGGAGGATGACAAAGAAGCA | TGAACATCCCAGTGACCAGA |  |
| ENST00000484550 | GACAACGGGTCCTCATGACT | GAAGGCACCTTATGCTCTGC |  |
| ENST00000439703 | TGACCTTGGTCCACAGACAA | TGCGACAAGCACTTCTCATC |  |
| ENST00000441644 | GTGGCAGTTCAGCCACAAT | CGCTCTAGCCAATCACCTTC |  |
| ENST00000456896 | CTGATTCAAGGGGTGGAGAA | TTTTGTCCAGATCCCTTTGC |  |
| ENST00000473756 | CCCTCACTGTCAACCCTGAT | CTGTGACCTCGGACAAATGA |  |
| ENST00000443593 | TGCCTGGGGGTCTGTAATAG | AGGCAAAAAGCCTGAAAACA |  |
| NR_026656 | ACAAACTTTTGGCAGGATGG | GTCTGGAACAAGCTGCCTTC |  |
| NR_026765 | GCAGGATTCCATCTTTTCCA | TTTCCAGCTCAGCTCCGTAT |  |
| NR_023938 | CTTCCTGAGGTCACACAGCA | CAGTGTGGCAGAAGGCAGTA |  |
