# Supplementary material for: BRAFV600E remodels the melanocyte transcriptome and induces BANCR to regulate melanoma cell migration
Source: HighWire-hosted journal article supplement (doi:10.1101/gr.140061.112), 2012-05-11
Supplement: suppmethodstab2.docx [file suppmethodstab2.docx]

**Supplementary methods table 2**

| **BANCR shRNA sequences** | |
| --- | --- |
|  | flanking sequence-sense sequence-loop-antisense sequence-flanking sequence |
| shRNA #1 | TGCTGTTGACAGTGAGCGCGGAAATAGACTGCAGCACCAATAGTGAAGCCACAGATGTATTGGTGCTGCAGTCTATTTCCTTGCCTACTGCCTCGGA |
| shRNA #2 | TGCTGTTGACAGTGAGCGCCTTTATGGATTCAACTGTAATTAGTGAAGCCACAGATGTAATTACAGTTGAATCCATAAAGTTGCCTACTGCCTCGGA |
