# Supplementary material for: BRAFV600E remodels the melanocyte transcriptome and induces BANCR to regulate melanoma cell migration
Source: HighWire-hosted journal article supplement (doi:10.1101/gr.140061.112), 2012-05-11
Supplement: supptab8.docx [file supptab8.docx]

**Supplementary table 8**

|  | **Neighboring** | **fold change** | | |
| --- | --- | --- | --- | --- |
| **lncRNA** | **gene symbol** | **MC + BRAF** | **Melanoma #1** | **Melanoma #2** |
| **BANCR** | FAM189A2 | 0.61 | 1.84 | 1.88 |
| TJP2 | 0.52 | 0.82 | 0.82 |
